# Supplementary material for: Synthesis of 4H-cyclopenta[c]furans via cooperative PdCl2–FeCl2 catalyzed cascade cyclization reaction involving a novel acyl rearrangement process
Source: Royal Society of Chemistry journal article supplement (doi:10.1039/c2cc31138k), 2012-01-01
Supplement: c2cc31138k.pdf [file c2cc31138k.pdf]

# Synthesis of 4*H*-Cyclopenta[*c*]furans via Cooperative PdCl<sub>2</sub>/FeCl<sub>2</sub> Catalyzed Cascade Cyclization Reaction Involving a Novel Acyl Rearrangement Process

*Huanfeng Jiang,\* Xiaoyan Pan, Liangbin Huang, Jian Zhao, Dabin Shi*

School of Chemistry and Chemical Engineering, South China University of  
Technology, Guangzhou 510640, P. R. China

*jianghf@scut.edu.cn*

## Supporting Information

### List of Contents

|                                                    |     |
|----------------------------------------------------|-----|
| A. General method.....                             | S2  |
| B. Screening reaction conditions.....              | S2  |
| C. General procedure for substrate 2a-2m.....      | S4  |
| D. Analytical data for 2a-2m.....                  | S4  |
| E. NMR spectra 2a-2m.....                          | S12 |
| F. X-Ray crystallographic analysis for 2a, 2k..... | S39 |

## A. General method

$^1\text{H}$  and  $^{13}\text{C}$  NMR spectra were recorded on BRUKER DRX-400 spectrometer using  $\text{CDCl}_3$  as solvent and TMS as an internal standard. Chemical shifts are reported relative to  $\text{CDCl}_3$  ( $^1\text{H}$  NMR 7.27;  $^{13}\text{C}$  NMR 77.0). IR spectra were obtained as potassium bromide pellets or as liquid films between two potassium bromide pellets. High-resolution mass spectra (ESI TOF (+)) were measured on ThermoFisher Scientific LTQ Orbitrap XL.

## B. Screening reaction conditions

Table 1. Optimization of reaction conditions<sup>[a]</sup>

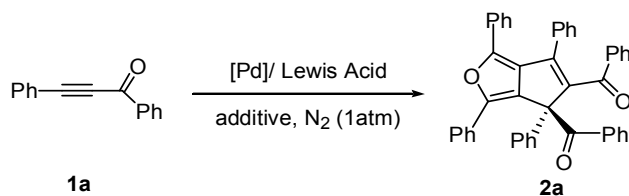

| Entry | Catalyst                                | Lewis Acid                        | Yield [%] <sup>[b]</sup>             |
|-------|-----------------------------------------|-----------------------------------|--------------------------------------|
| 1     | -                                       | -                                 | none                                 |
| 2     | $\text{PdCl}_2$                         | -                                 | 8                                    |
| 3     | $\text{PdCl}_2$                         | $\text{Cu}(\text{OTf})_2$         | 47                                   |
| 4     | $\text{PdCl}_2$                         | $\text{In}(\text{OTf})_3$         | 62                                   |
| 5     | $\text{PdCl}_2$                         | $\text{Zn}(\text{OAc})_2$         | 50                                   |
| 6     | $\text{PdCl}_2$                         | $\text{AgOTf}$                    | 43                                   |
| 7     | <b><math>\text{PdCl}_2</math></b>       | <b><math>\text{FeCl}_2</math></b> | <b>70</b>                            |
| 8     | $\text{PdCl}_2$                         | $\text{FeCl}_3$                   | 61                                   |
| 9     | $\text{PdCl}_2$                         | $\text{Fe}(\text{OTf})_2$         | 65                                   |
| 10    | $\text{PdCl}_2$                         | $\text{HCl}$                      | 28                                   |
| 11    | -                                       | $\text{FeCl}_2$                   | none                                 |
| 12    | $\text{Pd}(\text{OAc})_2$               | $\text{FeCl}_2$                   | 62                                   |
| 13    | $\text{PdCl}_2/\text{PPh}_3$            | $\text{FeCl}_2$                   | trace                                |
| 14    | $\text{PdCl}_2(\text{CH}_3\text{CN})_2$ | $\text{FeCl}_2$                   | 66                                   |
| 15    | $\text{Pd}(\text{dba})_2$               | $\text{FeCl}_2$                   | trace                                |
| 16    | $\text{Pd}(\text{PPh}_3)_4$             | $\text{FeCl}_2$                   | none                                 |
| 17    | $\text{PdCl}_2$                         | $\text{FeCl}_2$                   | 51 <sup>[c]</sup> , 5 <sup>[d]</sup> |

<sup>a</sup>Unless otherwise specified, all the reactions were carried out with 1a (1 mmol), Pd catalyst (10 mol %), Lewis acid (5 mol %), additive LiCl (2 equiv) in xylene (3.0 mL) at 80 °C under 1 atm  $\text{N}_2$  for 24 h. <sup>b</sup>Isolated yields. <sup>c</sup>The reaction was carried out under an atmospheric air. [d] The reaction was carried out under an atmospheric of  $\text{O}_2$  (1 atm).

**Table 2.** Screening of Pd Catalyst for the Reaction<sup>a</sup>

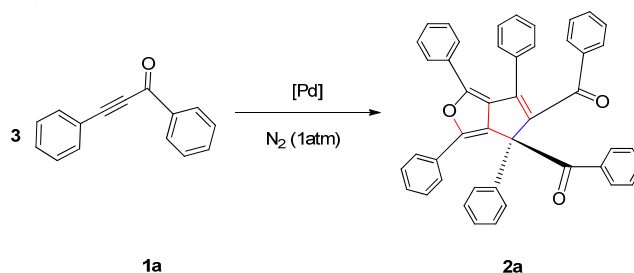

| Entry | Catalyst                                           | Lewis acid              | Solvent                   | Yield[%] <sup>b</sup> |
|-------|----------------------------------------------------|-------------------------|---------------------------|-----------------------|
| 1     | PdCl <sub>2</sub> (Ph <sub>3</sub> P) <sub>2</sub> | FeCl <sub>2</sub>       | Xylene                    | trace                 |
| 2     | <b>PdCl<sub>2</sub></b>                            | <b>FeCl<sub>2</sub></b> | <b>Xylene<sup>c</sup></b> | <b>70</b>             |
| 3     | PdBr <sub>2</sub>                                  | FeCl <sub>2</sub>       | Xylene                    | 40                    |
| 4     | PdI <sub>2</sub>                                   | FeCl <sub>2</sub>       | Xylene                    | 25                    |
| 5     | Pd(OH) <sub>2</sub>                                | FeCl <sub>2</sub>       | Xylene                    | 28                    |

<sup>a</sup>Unless otherwise specified, all the reactions were carried out with **1a** (1 mmol), Pd catalyst (10 mol %), Lewis acid FeCl<sub>2</sub> (5 mol %), additive LiCl (2 equiv), solvent (3.0 mL), at 80 °C, under 1atm N<sub>2</sub>, for 24 h. <sup>b</sup>Isolated yields. <sup>c</sup>The xylene used in the experiments was dried by 4 Å molecular sieves.

**Table 3.** Screening of Lewis acid for the Reaction<sup>a</sup>

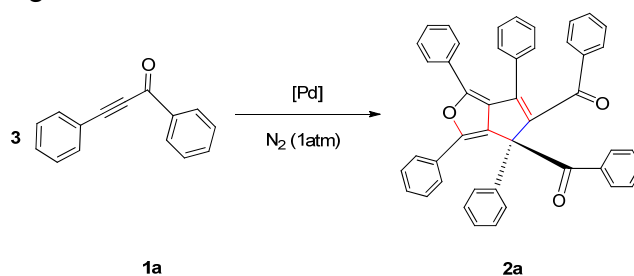

| Entry | Catalyst                | Lewis acid              | Solvent             | Yield[%] <sup>b</sup> |
|-------|-------------------------|-------------------------|---------------------|-----------------------|
| 1     | PdCl <sub>2</sub>       | Zn(OTf) <sub>2</sub>    | Xylene              | 45                    |
| 2     | PdCl <sub>2</sub>       | NiCl <sub>2</sub>       | Xylene <sup>c</sup> | 30                    |
| 3     | PdCl <sub>2</sub>       | TiCl <sub>4</sub>       | Xylene              | 48                    |
| 4     | PdCl <sub>2</sub>       | ZnBr <sub>2</sub>       | Xylene              | 25                    |
| 5     | PdCl <sub>2</sub>       | ZnCl <sub>2</sub>       | Xylene              | 14                    |
| 6     | PdCl <sub>2</sub>       | ZnI <sub>2</sub>        | Xylene              | 18                    |
| 7     | PdCl <sub>2</sub>       | AlCl <sub>3</sub>       | Xylene              | trace                 |
| 8     | PdCl <sub>2</sub>       | HCl                     | Xylene              | 28                    |
| 9     | <b>PdCl<sub>2</sub></b> | <b>FeCl<sub>2</sub></b> | <b>Xylene</b>       | <b>70</b>             |
| 10    | PdCl <sub>2</sub>       | none                    | Xylene              | 10                    |

<sup>a</sup>Unless otherwise specified, all the reactions were carried out with **1a** (1 mmol), Pd catalyst (10 mol %), Lewis acid (5 mol %), additive LiCl (2 equiv), solvent (3.0 mL), under 1atm N<sub>2</sub>, at 80 °C, for 24 h. <sup>b</sup>Isolated yields. <sup>c</sup>The xylene used in the experiments was dried by 4 Å molecular sieves.

**Table 4.** Screening of Additive, Solvent and Temperature for the Reaction<sup>a</sup>

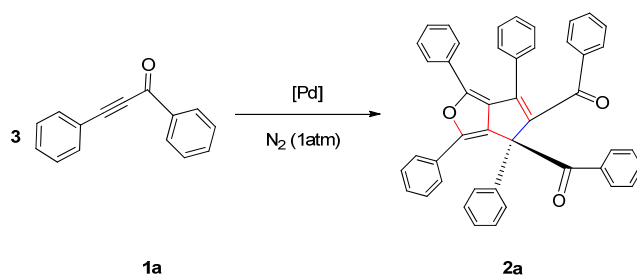

| Entry          | Catalyst                | Additive           | Solvent                         | T(°C)     | Yield[%] <sup>b</sup> |
|----------------|-------------------------|--------------------|---------------------------------|-----------|-----------------------|
| 1              | PdCl <sub>2</sub>       | LiCO <sub>3</sub>  | Xylene <sup>c</sup>             | 80        | 25                    |
| 2              | PdCl <sub>2</sub>       | NH <sub>4</sub> Cl | Xylene                          | 80        | 23                    |
| <b>3</b>       | <b>PdCl<sub>2</sub></b> | <b>LiCl</b>        | <b>Xylene</b>                   | <b>80</b> | <b>70</b>             |
| 4 <sup>d</sup> | PdCl <sub>2</sub>       | LiCl               | Xylene                          | 80        | 58                    |
| 5              | PdCl <sub>2</sub>       | LiCl               | EtOH                            | 80        | trace                 |
| 6              | PdCl <sub>2</sub>       | LiCl               | DMF                             | 80        | 10                    |
| 7              | PdCl <sub>2</sub>       | LiCl               | CH <sub>3</sub> NO <sub>2</sub> | 80        | 20                    |
| 8              | PdCl <sub>2</sub>       | LiCl               | CHCl <sub>3</sub>               | 80        | 30                    |
| 9              | PdCl <sub>2</sub>       | LiCl               | DMAP                            | 80        | 10                    |
| 10             | PdCl <sub>2</sub>       | LiCl               | DMSO                            | 80        | 15                    |
| 11             | PdCl <sub>2</sub>       | LiCl               | Xylene                          | 60        | 52                    |
| 12             | PdCl <sub>2</sub>       | LiCl               | Xylene                          | 100       | 54                    |

<sup>a</sup>Unless otherwise specified, all the reactions were carried out with **1a** (1 mmol), Pd catalyst (10 mol %), Lewis acid FeCl<sub>2</sub> (5 mol %), additive (2 equiv), solvent (3.0 mL), under 1atm N<sub>2</sub>, for 24 h. <sup>b</sup>Isolated yields. <sup>c</sup>The xylene used in the experiments was dried by 4 Å molecular sieves. <sup>d</sup>The reaction time was 12 h.

## C. General procedure for substrate 2a-2m

A mixture of 1,3-diphenylprop-2-yn-1-one (1mmol), PdCl<sub>2</sub>(10 mol %), FeCl<sub>2</sub> (5 mol %), LiCl (2 equiv) in xylene (3 mL) was added into a schlenk tube. The tube was then put into a 80 °C oil bath under magnetic stirring for 24 h under the atmosphere of N<sub>2</sub> (1atm). After the reaction was finished, the reaction mixture was cooled to room temperature, and extracted the crude product with ethyl acetate. The organic extract was concentrated in vacuum, and the resulting residue was purified by silica gel column chromatography using light petroleum ether/ethyl acetate as eluent to afford the desired products, which were further recrystallized from EtOAc/EtOH.

## D. Analytical data for 2a-2m

(1,3,4,6-tetraphenyl-4*H*-cyclopenta[*c*]furan-4,5-diyl)bis(phenylmethanone) (**2a**)

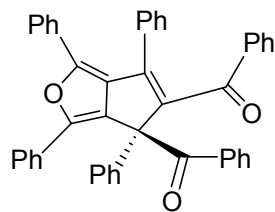

m.p. 232-235 °C; IR (KBr): 3058, 1682, 1639, 1597, 1491, 1446, 1237, 1180, 799, 766, 692;  $^1\text{H}$  NMR (400 MHz,  $\text{CDCl}_3$ )  $\delta$  7.72 (d,  $J = 7.6$  Hz, 2H), 7.63 (d,  $J = 7.6$  Hz, 2H), 7.53 (d,  $J = 7.2$  Hz, 2H), 7.37–7.28 (m, 3H), 7.24–7.12 (m, 11H), 7.07–7.02 (m, 4H), 6.97–6.94 (m, 2H), 6.90–6.84 (m, 4H);  $^{13}\text{C}$  NMR (100 MHz,  $\text{CDCl}_3$ )  $\delta$  195.59, 195.20, 149.11, 146.86, 145.73, 142.01, 139.14, 137.86, 135.15, 133.32, 132.87, 131.90, 131.04, 129.45, 128.90, 128.80, 128.70, 128.62, 128.33, 128.26, 128.07, 128.02, 127.69, 127.66, 127.40, 127.23, 127.11, 125.49, 69.82; HRMS (ESI): Anal. calcd. for  $\text{C}_{45}\text{H}_{30}\text{NaO}_3$   $m/z$  641.2093  $[\text{M} + \text{Na}]^+$ , found 641.2069.

**(3,4,6-triphenyl-1-(*p*-tolyl)-4*H*-cyclopenta[*c*]furan-4,5-diyl)bis(*p*-tolylmethanone (2b)**

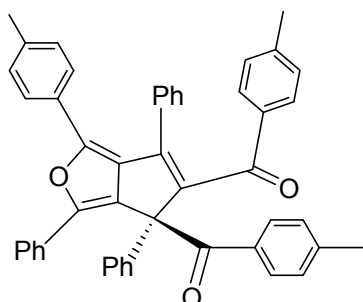

m.p. 219-220 °C; IR (KBr): 3058, 2921, 1682, 1638, 1605, 1498, 1237, 1180, 739, 698;  $^1\text{H}$  NMR (400 MHz,  $\text{CDCl}_3$ )  $\delta$  7.72 (d,  $J = 6.8$  Hz, 2H), 7.63 (d,  $J = 7.2$  Hz, 2H), 7.50 (d,  $J = 6.4$  Hz, 2H), 7.32–7.28 (m, 2H), 7.22–7.19 (m, 4H), 7.12–7.05 (m, 5H), 7.03–6.97 (m, 8H), 6.67 (d,  $J = 8$  Hz, 2H), 2.33 (s, 3H), 2.29 (s, 3H), 2.10 (s, 3H);  $^{13}\text{C}$  NMR (100 MHz,  $\text{CDCl}_3$ )  $\delta$  194.94, 194.75, 149.19, 146.42, 145.77, 142.62, 141.60, 140.88, 138.24, 136.34, 135.49, 135.30, 133.61, 132.26, 129.09, 128.97, 128.93, 128.76, 128.66, 128.54, 128.47, 128.40, 128.21, 128.09, 127.98, 127.77, 127.49, 127.41, 127.13, 126.86, 125.40, 69.84, 21.41, 21.36, 21.28; HRMS (ESI): Anal. calcd. for  $\text{C}_{48}\text{H}_{36}\text{NaO}_3$   $m/z$  683.2562  $[\text{M} + \text{Na}]^+$ , found 683.2549.

**(1-(2-methoxyphenyl)-3,4,6-triphenyl-4*H*-cyclopenta[*c*]furan-4,5-diyl)bis((2-methoxyphenyl)methanone**

**oxyphenyl)methanone) (2c)**

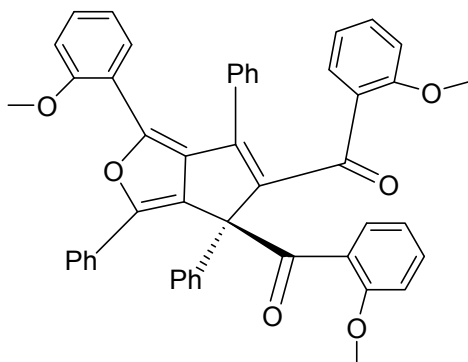

m.p. 218-220 °C; IR (KBr): 3060, 2936, 2836, 1703, 1602, 1490, 1459, 1282, 1251, 1024, 749, 696; <sup>1</sup>H NMR (400 MHz, CDCl<sub>3</sub>) δ 7.78–7.75 (m, 1H), 7.73–7.71 (m, 2H), 7.67–7.65 (m, 2H), 7.48–7.45 (m, 1H), 7.29–7.23 (m, 6H), 7.21–7.16 (m, 4H), 6.94–6.82 (m, 4H), 6.75–6.70 (m, 5H), 6.64 (d, *J* = 8.4 Hz, 1H), 6.46 (d, *J* = 8.4 Hz, 1H), 6.42–6.38 (m, 1H), 6.26 (d, *J* = 8.4 Hz, 1H), 3.48 (s, 3H), 3.19 (s, 3H), 2.78 (s, 3H); <sup>13</sup>C NMR (100 MHz, CDCl<sub>3</sub>) δ 195.52, 193.89, 157.41, 156.57, 156.12, 148.67, 147.34, 145.42, 141.09, 134.86, 134.40, 133.79, 132.11, 130.05, 129.98, 129.93, 129.84, 129.67, 129.63, 128.97, 128.56, 128.14, 127.99, 127.73, 127.63, 127.18, 127.15, 126.57, 126.04, 125.54, 119.80, 119.37, 119.25, 118.25, 110.70, 110.25, 110.08, 70.92, 55.01, 54.89, 53.78; HRMS (ESI): Anal. calcd. for C<sub>48</sub>H<sub>36</sub>NaO<sub>6</sub> *m/z* 731.2410 [M + Na]<sup>+</sup>, found 731.2388.

**(1-(4-bromophenyl)-3,4,6-triphenyl-4H-cyclopenta[c]furan-4,5-diyl)bis((4-bromophenyl)methanone) (2d)**

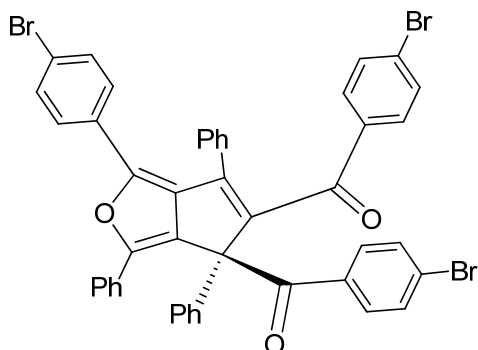

m.p. 191-195 °C; IR (KBr): IR (KBr): 3074, 2921, 1742, 1686, 1646, 1582, 1484, 1393, 1239, 1066, 1009, 831, 734, 702; <sup>1</sup>H NMR (400 MHz, CDCl<sub>3</sub>) δ 7.60 (d, *J* = 8.0 Hz, 4H), 7.46–7.39 (m, 4H), 7.34–7.29 (m, 4H), 7.24–7.14 (m, 5H), 7.09–7.02 (m,

6H), 6.92–6.88 (m, 4H);  $^{13}\text{C}$  NMR (100 MHz,  $\text{CDCl}_3$ )  $\delta$  194.10, 194.07, 148.91, 147.30, 144.84, 141.57, 137.64, 136.29, 134.67, 132.85, 132.77, 131.35, 131.05, 130.82, 130.21, 129.31, 129.22, 128.72, 128.67, 128.50, 128.43, 128.34, 128.08, 127.98, 127.31, 126.69, 126.10, 125.48, 122.63, 69.66; HRMS (ESI): Anal. calcd. for  $\text{C}_{45}\text{H}_{27}\text{Br}_3\text{NaO}_3$   $m/z$  874.9408  $[\text{M} + \text{Na}]^+$ , found 874.9420.

**(1-(4-fluorophenyl)-3,4,6-triphenyl-4*H*-cyclopenta[*c*]furan-4,5-diyl)bis((4-fluorophenyl)methanone) (2e)**

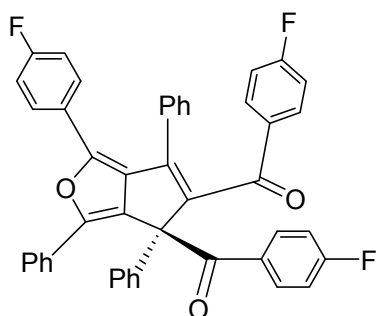

m.p. 210–213 °C; IR (KBr): 3070, 2922, 1687, 1644, 1596, 1501, 1233, 1156, 846, 741, 698, 604;  $^1\text{H}$  NMR (400 MHz,  $\text{CDCl}_3$ )  $\delta$  7.78–7.75 (m, 2H), 7.59 (d,  $J = 7.2$  Hz, 2H), 7.47–7.44 (m, 2H), 7.33–7.30 (m, 2H), 7.23–7.21 (m, 4H), 7.17–7.11 (m, 3H), 7.08–7.01 (m, 4H), 6.96–6.85 (m, 6H), 6.58–6.53 (m, 2H);  $^{13}\text{C}$  NMR (100 MHz,  $\text{CDCl}_3$ )  $\delta$  193.84, 193.69, 166.17, 165.69, 163.87, 163.64, 163.19, 161.39, 148.81, 147.03, 144.97, 141.28, 135.21, 135.18, 134.95, 134.00, 133.97, 132.98, 132.16, 131.48, 131.38, 130.28, 130.19, 129.19, 129.11, 129.06, 128.73, 128.71, 128.57, 128.52, 128.45, 128.36, 128.25, 127.88, 126.82, 125.63, 125.60, 125.45, 115.41, 115.19, 114.97, 114.83, 114.75, 114.61, 69.79; HRMS (ESI): Anal. calcd. for  $\text{C}_{45}\text{H}_{27}\text{NaO}_3$   $m/z$  695.1810  $[\text{M} + \text{Na}]^+$ , found 695.1789.

**1,1'-(1-methyl-3,4,6-triphenyl-4*H*-cyclopenta[*c*]furan-4,5-diyl)diethanone (2f)**

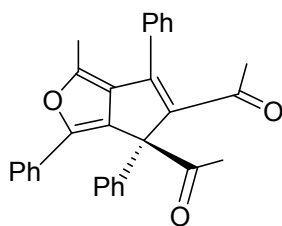

m.p. 139–140 °C; IR (KBr): 3064, 2921, 1710, 1638, 1549, 1495, 1166, 757, 729, 696;  $^1\text{H}$  NMR (400 MHz,  $\text{CDCl}_3$ )  $\delta$  7.50 (d,  $J = 6.8$  Hz, 3H), 7.40 (d,  $J = 7.6$  Hz, 6H),

7.25–7.23 (m, 5H), 7.17–7.13(m, 1H), 2.24 (s, 3H), 2.11 (s, 3H), 1.69 (s, 3H);  $^{13}\text{C}$  NMR (100 MHz,  $\text{CDCl}_3$ )  $\delta$  199.54, 198.73, 149.02, 145.78, 144.92, 143.95, 135.25, 133.69, 133.24, 129.32, 129.09, 128.94, 128.47, 128.07, 127.98, 127.49, 127.35, 124.87, 69.74, 30.52, 25.23, 12.78; HRMS (ESI): Anal. calcd. for  $\text{C}_{30}\text{H}_{24}\text{NaO}_3$   $m/z$  455.1623  $[\text{M} + \text{Na}]^+$ , found 455.1629.

**(3,4,6-tris(4-methoxyphenyl)-1-phenyl-4*H*-cyclopenta[*c*]furan-4,5-diyl)bis(phenylmethanone) (2g)**

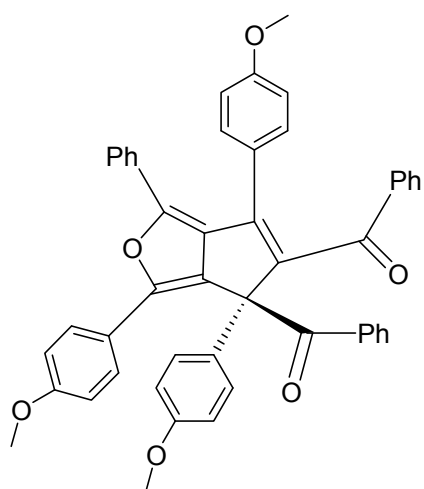

m.p. 224–226 °C; IR (KBr): 3064, 2937, 1608, 1509, 1460, 1253, 1179, 1030, 833, 796, 694;  $^1\text{H}$  NMR (400 MHz,  $\text{CDCl}_3$ )  $\delta$  7.67 (d,  $J = 7.6$  Hz, 2H), 7.57 (d,  $J = 9.2$  Hz, 2H), 7.44 (d,  $J = 8.8$  Hz, 2H), 7.35–7.31 (m, 1H), 7.24–7.16 (m, 7H), 7.11–7.07 (m, 3H), 6.91–6.84 (m, 4H), 6.80–6.75 (m, 4H), 6.46 (d,  $J = 8.8$  Hz, 2H), 3.77 (s, 3H), 3.71 (s, 3H), 3.64 (s, 3H);  $^{13}\text{C}$  NMR (100 MHz,  $\text{CDCl}_3$ )  $\delta$  196.38, 195.45, 159.79, 159.44, 158.79, 148.76, 146.89, 144.99, 141.98, 139.32, 137.93, 132.88, 131.77, 130.80, 130.49, 129.99, 129.75, 128.87, 128.05, 128.00, 127.62, 127.59, 127.44, 127.39, 127.27, 127.09, 125.69, 125.44, 121.88, 114.12, 113.62, 113.38, 69.03, 55.21, 55.09; HRMS (ESI): Anal. calcd. for  $\text{C}_{48}\text{H}_{36}\text{NaO}_6$   $m/z$  731.2410  $[\text{M} + \text{Na}]^+$ , found 731.2390.

**(3,4,6-tri(4-(*tert*-butyl)phenyl)-1-phenyl-4*H*-cyclopenta[*c*]furan-4,5-diyl)bis(phenylmethanone) (2h)**



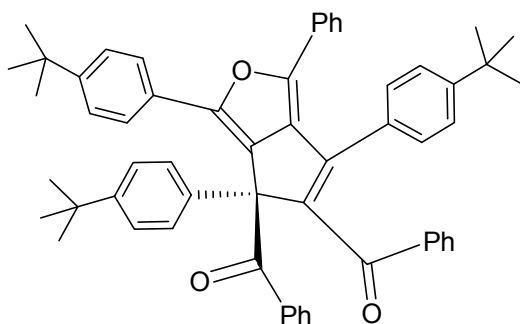

m.p. 254-256 °C; IR (KBr): 3071, 2960, 1690, 1646, 1511, 1462, 1242, 751, 698;  
 $^1\text{H}$  NMR (400 MHz,  $\text{CDCl}_3$ )  $\delta$  7.74 (d,  $J = 7.2$  Hz, 2H), 7.60 (d,  $J = 8.4$  Hz, 2H), 7.45 (d,  $J = 8.4$  Hz, 2H), 7.37–7.34 (m, 3H), 7.26–7.23 (m, 5H), 7.20 (d,  $J = 7.2$  Hz, 3H), 7.15–7.11 (m, 2H), 7.03–7.00 (m, 1H), 6.95 (d,  $J = 8.0$  Hz, 4H), 6.84–6.78 (m, 4H), 1.29 (s, 9H), 1.22 (s, 9H), 1.15 (s, 9H);  $^{13}\text{C}$  NMR (100 MHz,  $\text{CDCl}_3$ )  $\delta$  195.91, 195.44, 151.68, 151.01, 150.22, 149.47, 147.02, 145.38, 142.25, 139.28, 138.38, 133.14, 132.50, 131.33, 130.97, 130.52, 129.72, 128.72, 128.24, 127.99, 127.96, 127.78, 127.65, 127.13, 126.72, 126.24, 125.61, 125.34, 125.29, 124.71, 69.35, 34.66, 34.45, 34.35, 31.20, 31.15, 30.99; HRMS (ESI): Anal. calcd. for  $\text{C}_{57}\text{H}_{54}\text{NaO}_3$   $m/z$  809.3971  $[\text{M} + \text{Na}]^+$ , found 809.3938.

**(1-(4-fluorophenyl)-3,4,6-tri-p-tolyl-4*H*-cyclopenta[*c*]furan-4,5-diyl)bis((4-fluorophenyl)methanone) (2i)**

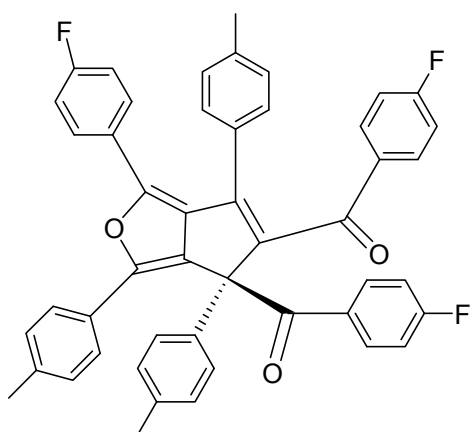

m.p. 235-337 °C; IR (KBr): 3063, 2930, 1698, 1640, 1510, 1451, 1210, 1137, 759, 692;  $^1\text{H}$  NMR (400 MHz,  $\text{CDCl}_3$ )  $\delta$  7.77–7.74 (m, 2H), 7.50 (d,  $J = 8.4$  Hz, 2H), 7.33 (d,  $J = 8.4$  Hz, 2H), 7.19–7.16 (m, 2H), 7.14–7.09 (m, 4H), 7.01 (d,  $J = 8.4$  Hz, 2H),

6.94–6.79 (m, 8H), 6.60–6.56 (m, 2H), 2.30 (s, 3H), 2.24 (s, 3H), 2.21 (s, 3H);  $^{13}\text{C}$  NMR (100 MHz,  $\text{CDCl}_3$ )  $\delta$  194.16, 193.89, 166.12, 165.57, 163.72, 163.60, 163.07, 161.24, 148.52, 147.14, 144.46, 141.35, 139.04, 138.20, 137.33, 135.29, 135.26, 134.07, 134.04, 132.21, 131.97, 131.54, 131.45, 130.25, 130.16, 130.06, 129.38, 129.18, 129.10, 129.06, 128.88, 128.73, 128.40, 126.19, 125.95, 125.83, 125.80, 125.40, 115.27, 115.05, 114.84, 114.73, 114.62, 114.52, 69.44, 21.27, 21.14, 20.95; HRMS(ESI): Anal. calcd. for  $\text{C}_{48}\text{H}_{33}\text{F}_3\text{NaO}_3$   $m/z$  737.2279  $[\text{M} + \text{Na}]^+$ , found 737.2288.

**(3,4,6-tri(2-fluorophenyl)-1-phenyl-4*H*-cyclopenta[*c*]furan-4,5-diyl)bis(phenylmethanone) (2j)**

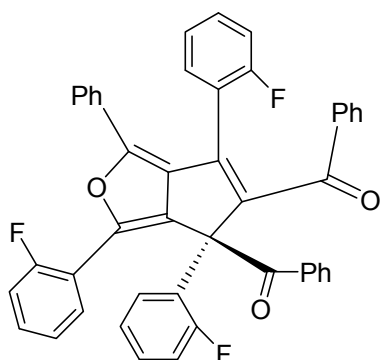

m.p. 203-204 °C; IR (KBr): 3064, 1683, 1655, 1489, 1448, 1235, 758, 693;  $^1\text{H}$  NMR (400 MHz,  $\text{CDCl}_3$ )  $\delta$  7.71–7.66 (m, 3H), 7.40–7.34 (m, 2H), 7.26–6.82 (m, 22H), 6.73–6.69(m, 1H);  $^{13}\text{C}$  NMR (100 MHz,  $\text{CDCl}_3$ )  $\delta$  193.85, 193.16, 162.45, 160.67, 160.46, 159.96, 158.20, 157.93, 148.30, 146.17, 142.64, 137.53, 136.56, 132.12, 131.36, 130.92, 130.84, 130.58, 130.40, 130.16, 130.08, 129.75, 129.66, 129.56, 128.63, 128.26, 128.21, 127.90, 127.70, 127.52, 126.36, 124.13, 124.10, 123.97, 123.93, 117.26, 117.14, 116.41, 116.26, 116.19, 116.03, 115.57, 115.37, 67.61; HRMS(ESI): Anal. calcd. for  $\text{C}_{45}\text{H}_{27}\text{F}_3\text{NaO}_3$   $m/z$  695.1810  $[\text{M} + \text{Na}]^+$ , found 695.1801.

**(3,4,6-tris(3-fluorophenyl)-1-phenyl-4*H*-cyclopenta[*c*]furan-4,5-diyl)bis(phenylmethanone) (2k)**

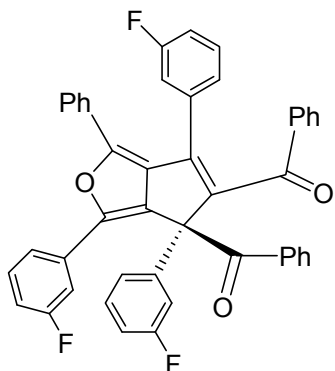

m.p. 222-224 °C; IR (KBr): 3068, 1686, 1640, 1586, 1487, 1442, 1263, 876, 783, 694;  $^1\text{H}$  NMR (400 MHz,  $\text{CDCl}_3$ )  $\delta$  7.66 (d,  $J = 7.2$  Hz, 2H), 7.45–7.36 (m, 2H), 7.32–7.10 (m, 14H), 7.04 (d,  $J = 7.6$  Hz, 2H), 6.97–6.89 (m, 5H), 6.78–6.73 (m, 1H), 6.67 (d,  $J = 7.6$  Hz, 1H), 6.56 (d,  $J = 9.2$  Hz, 1H);  $^{13}\text{C}$  NMR (100 MHz,  $\text{CDCl}_3$ )  $\delta$  194.84, 194.40, 164.12, 163.79, 163.29, 161.68, 161.36, 160.82, 149.08, 146.56, 145.86, 145.83, 141.04, 141.02, 138.71, 137.50, 137.30, 137.22, 135.07, 134.99, 132.34, 132.24, 131.37, 130.50, 130.47, 130.41, 130.38, 130.01, 129.92, 129.87, 129.79, 128.93, 128.84, 128.65, 128.25, 127.84, 127.63, 127.51, 127.48, 127.33, 124.71, 124.68, 124.65, 124.62, 121.48, 121.45, 116.07, 115.84, 115.62, 115.61, 115.30, 115.09, 114.98, 114.78, 112.12, 111.88, 69.40; HRMS(ESI): Anal. calcd. for  $\text{C}_{45}\text{H}_{27}\text{F}_3\text{NaO}_3$   $m/z$  695.1810  $[\text{M} + \text{Na}]^+$ , found 695.1829.

**(3,4,6-trihexyl-1-phenyl-4*H*-cyclopenta[*c*]furan-4,5-diyl)bis(phenylmethanone)**

**(21)**

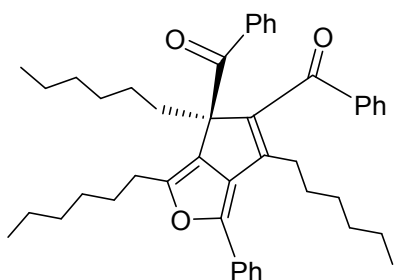

Buff oil; IR (KBr): 3063, 2926, 2860, 1712, 1653, 1591, 1455, 1329, 1236, 1173, 698;  $^1\text{H}$  NMR (400 MHz,  $\text{CDCl}_3$ )  $\delta$  7.68–7.66 (m, 2H), 7.57–7.54 (m, 2H), 7.51–7.29 (m, 9H), 7.18–7.14 (m, 2H), 2.61–2.57 (m, 1H), 2.45–2.18 (m, 4H), 1.63–1.55 (m, 2H), 1.29–1.21 (m, 14H), 1.09–0.95 (m, 5H), 0.84–0.79 (m, 10H), 0.70 (t,  $J = 7.2$  Hz, 3H);  $^{13}\text{C}$  NMR (100 MHz,  $\text{CDCl}_3$ )  $\delta$  200.05, 193.62, 148.91, 147.73, 146.16, 144.96,

139.52, 139.08, 132.11, 131.96, 131.03, 130.71, 128.54, 128.51, 128.32, 128.01, 127.56, 127.49, 126.54, 63.26, 32.84, 31.66, 31.44, 30.99, 29.66, 29.55, 28.86, 28.54, 27.98, 26.76, 23.98, 22.54, 22.42, 22.12, 13.96, 13.94, 13.84; HRMS(ESI): Anal. calcd. for C<sub>45</sub>H<sub>54</sub>NaO<sub>3</sub> m/z 665.3971 [M + Na]<sup>+</sup>, found 665.3986.

### 1,1'-(3,4,6-triethyl-1-methyl-4*H*-cyclopenta[*c*]furan-4,5-diyl)diethanone (2m)

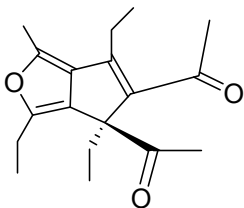

Buff oil; IR (KBr): 2976, 2938, 2882, 1710, 1361, 1254, 1172; <sup>1</sup>H NMR (400 MHz, CDCl<sub>3</sub>) δ 2.89–2.83 (m, 2H), 2.45–2.38 (m, 8H), 2.15–2.09 (m, 1H), 1.98–1.93 (m, 1H), 1.74 (s, 3H), 1.29 (t, *J* = 7.6 Hz, 3H), 1.06 (t, *J* = 7.6 Hz, 3H), 0.44 (t, *J* = 7.6 Hz, 3H); <sup>13</sup>C NMR (100 MHz, CDCl<sub>3</sub>) δ 205.46, 195.76, 152.54, 147.52, 143.36, 142.66, 131.05, 123.52, 64.49, 29.89, 24.56, 23.98, 21.85, 19.97, 13.98, 13.15, 12.74, 8.24; HRMS (ESI): Anal. calcd. for C<sub>18</sub>H<sub>24</sub> NaO<sub>3</sub> m/z 311.1623 [M + Na]<sup>+</sup>, found 311.1618.

## E. NMR spectra for 2a-2p

**2a:**

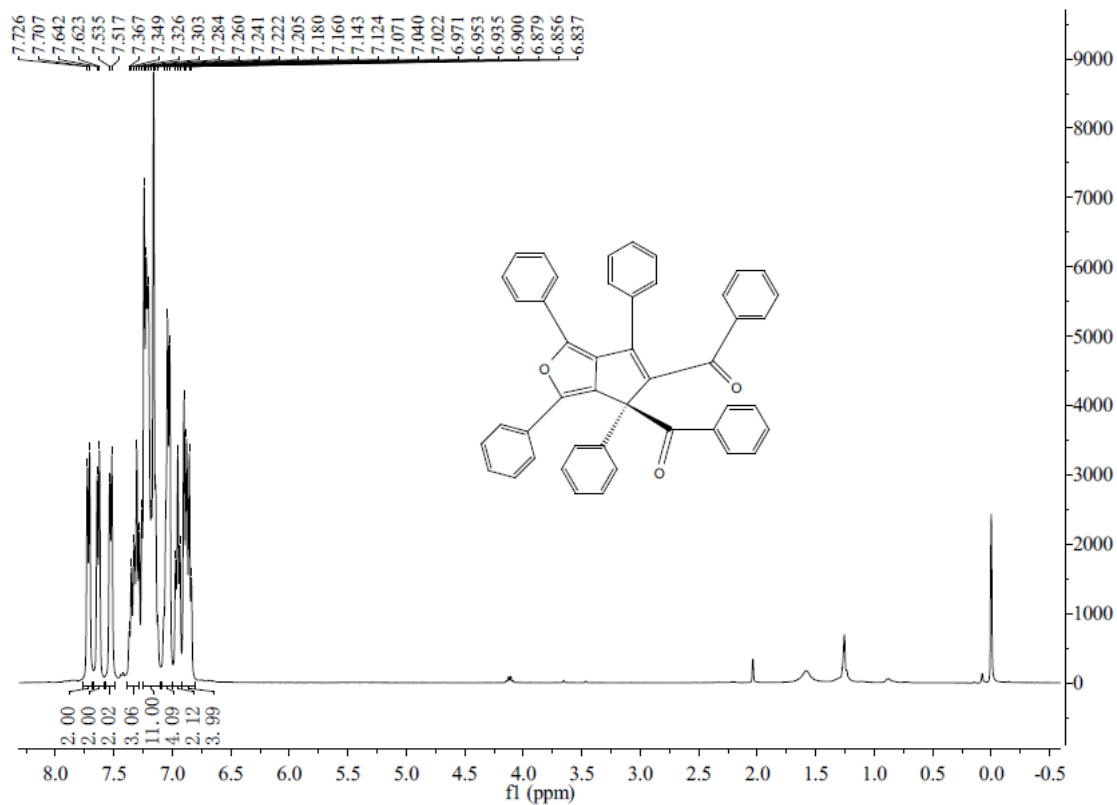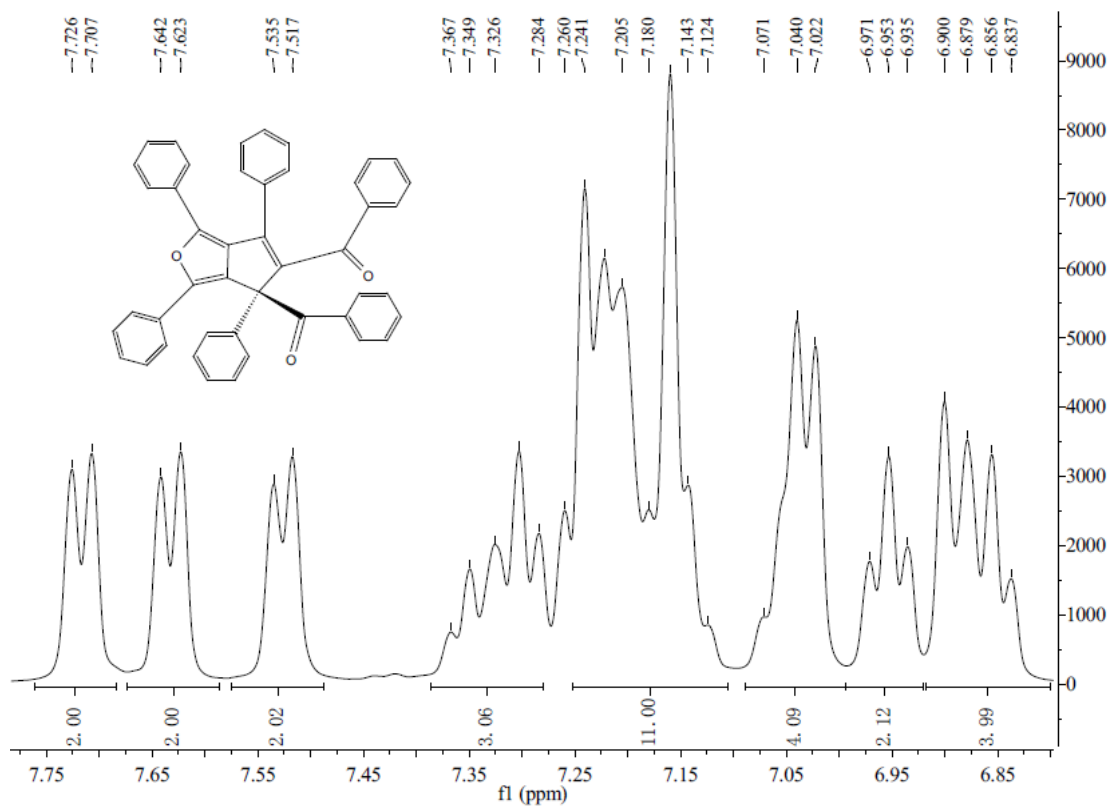

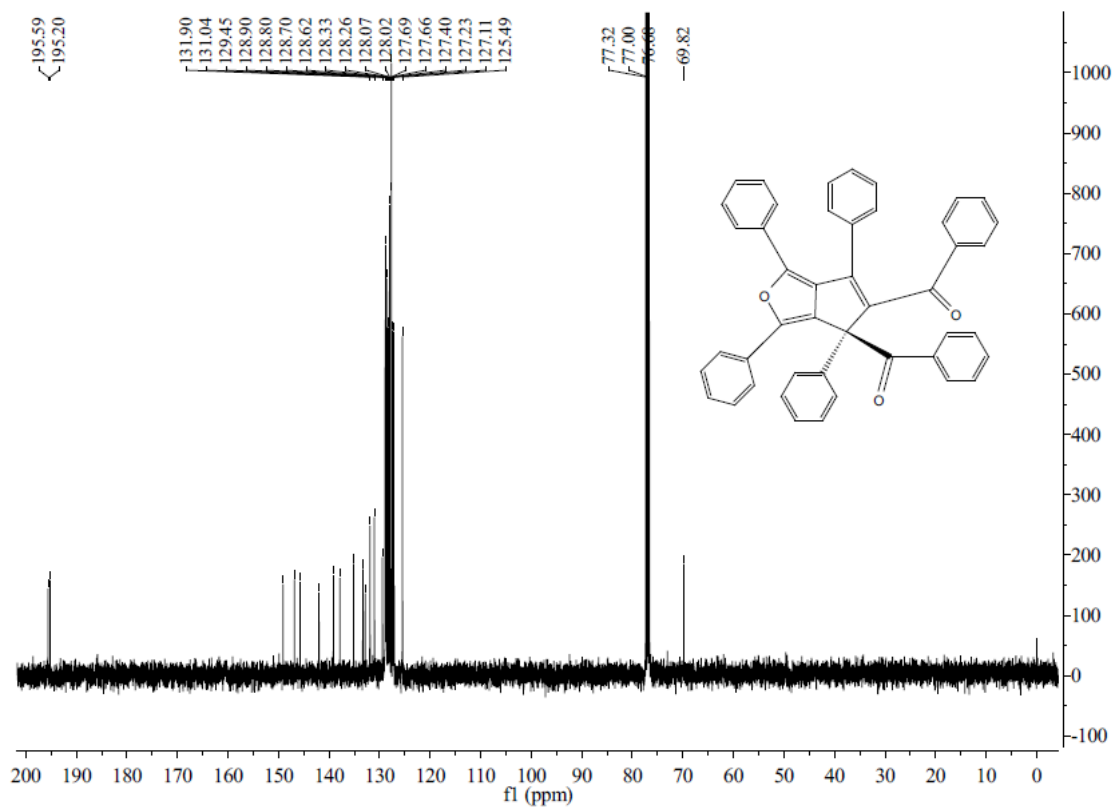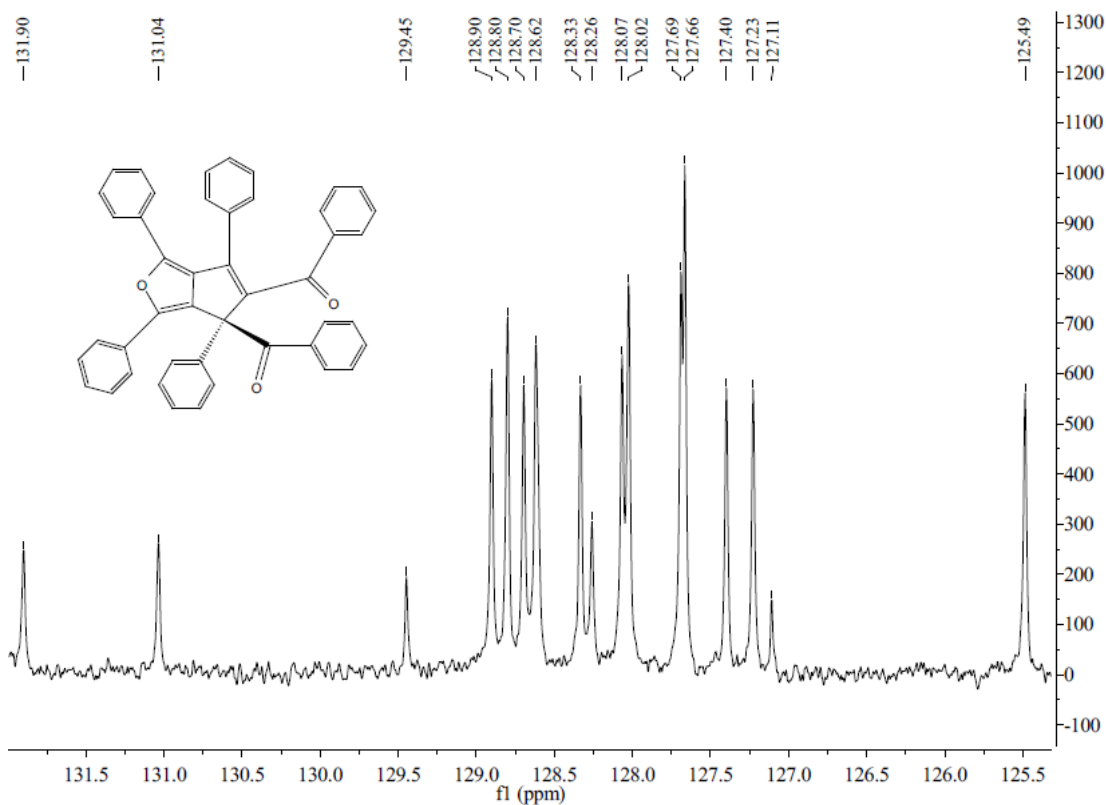

**2b:**

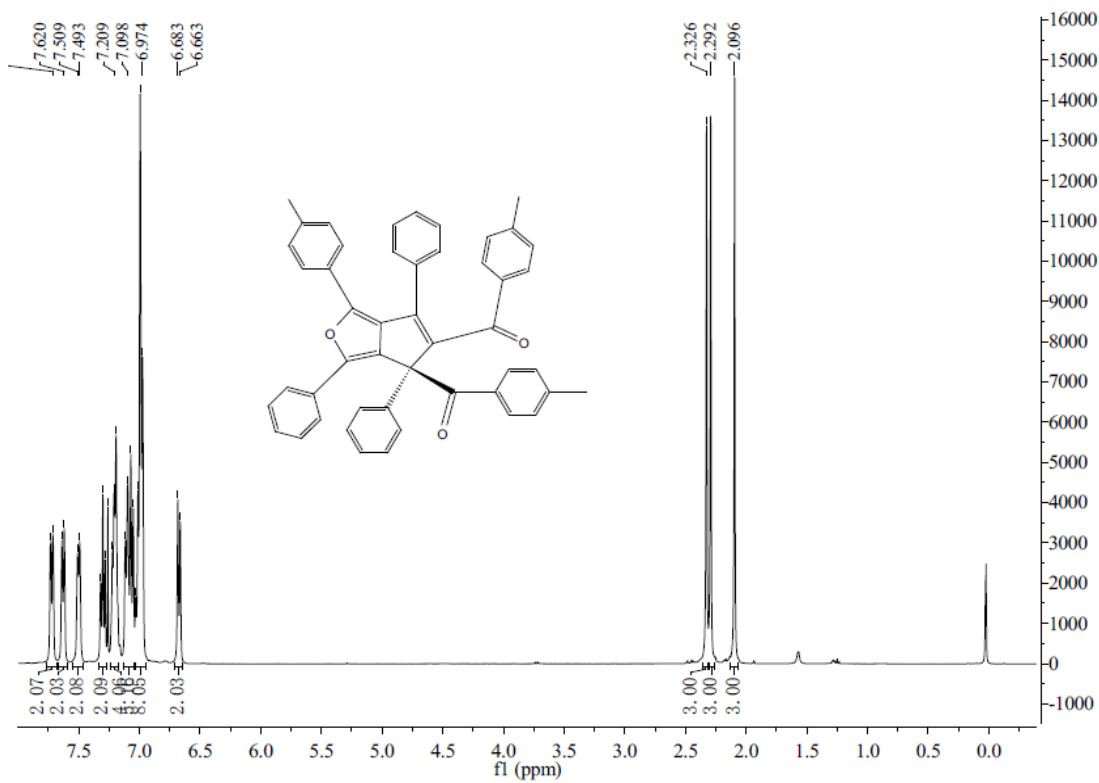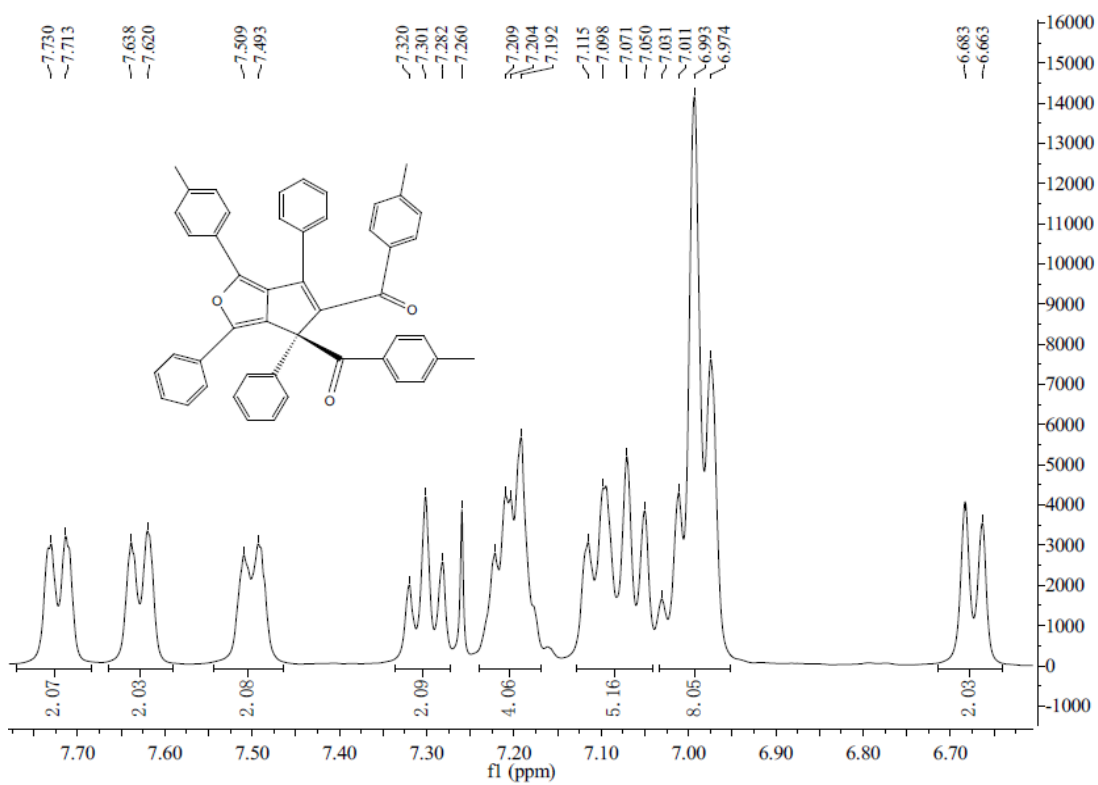

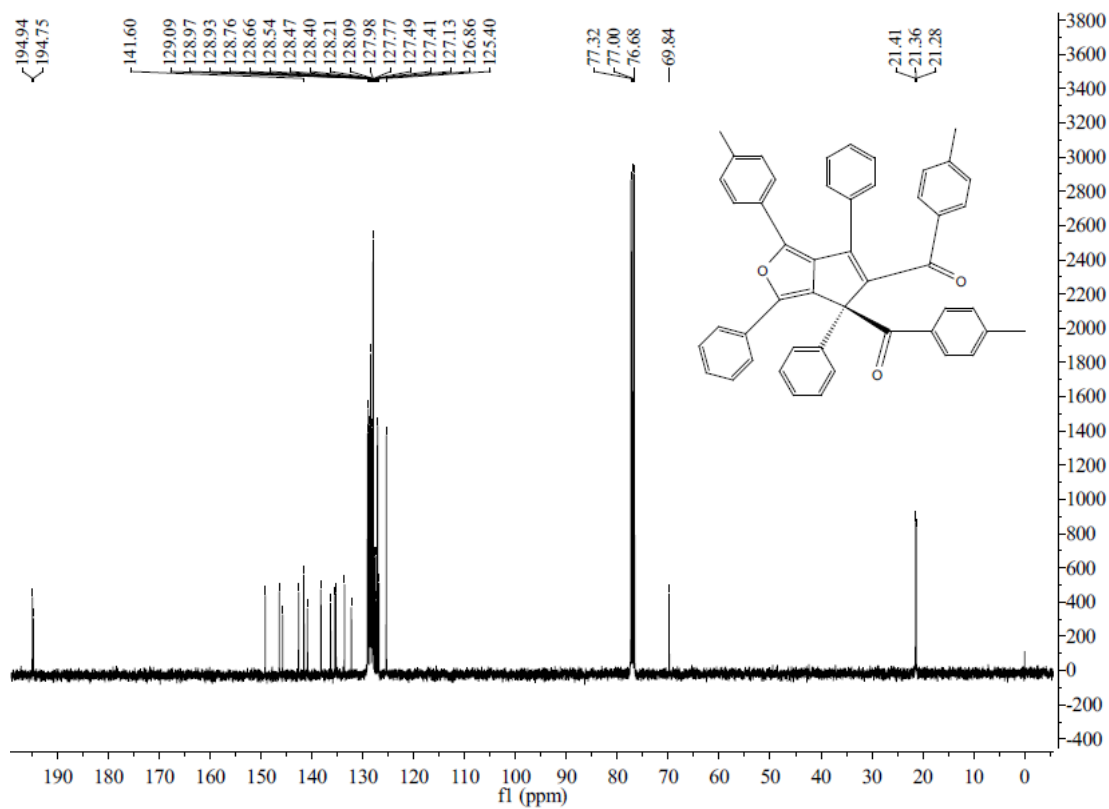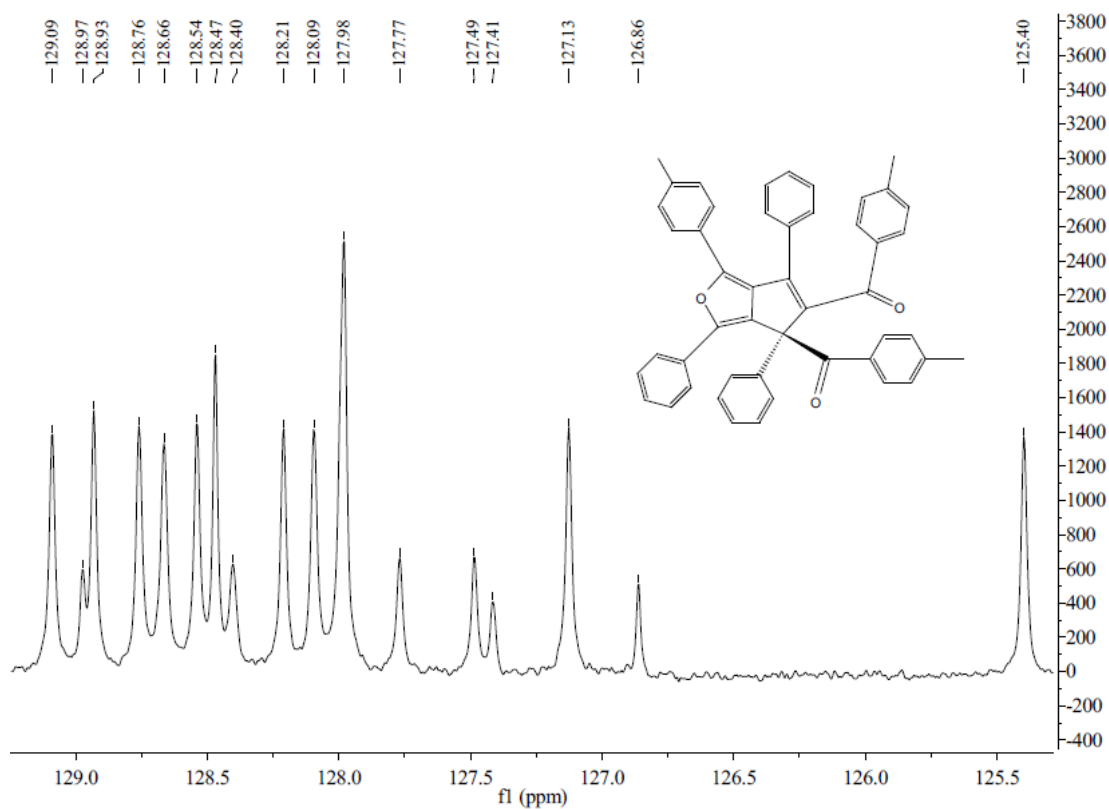

**2c:**



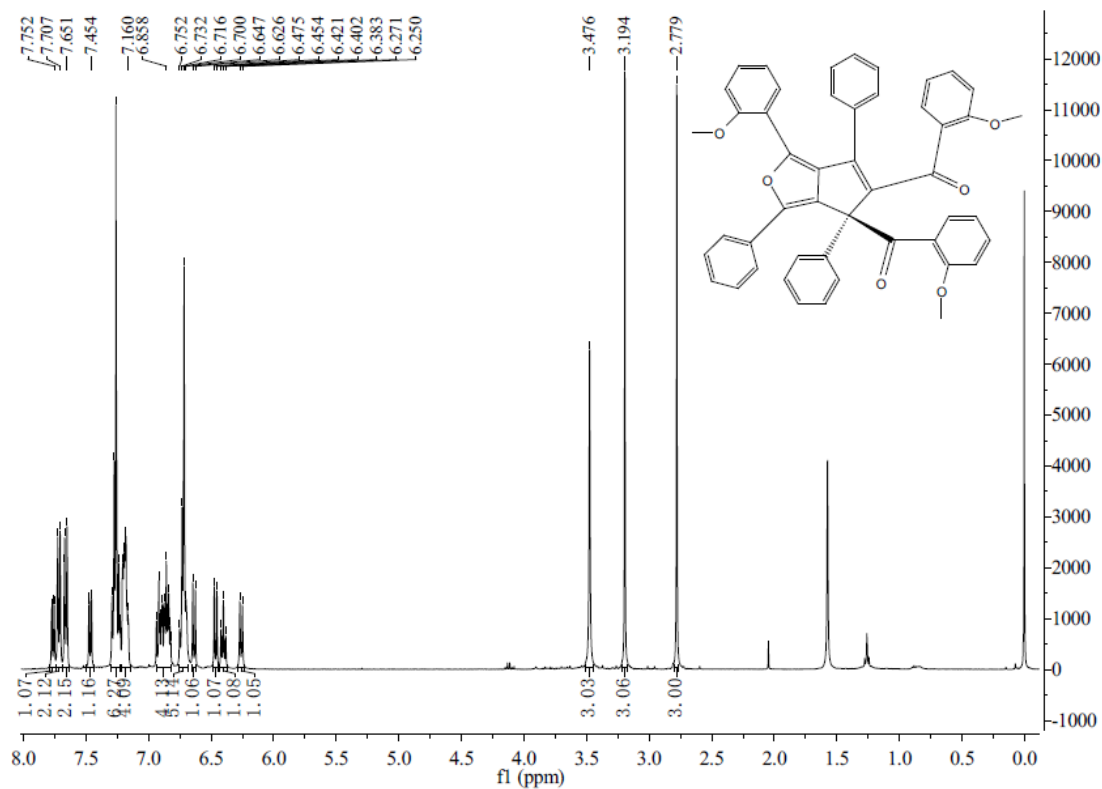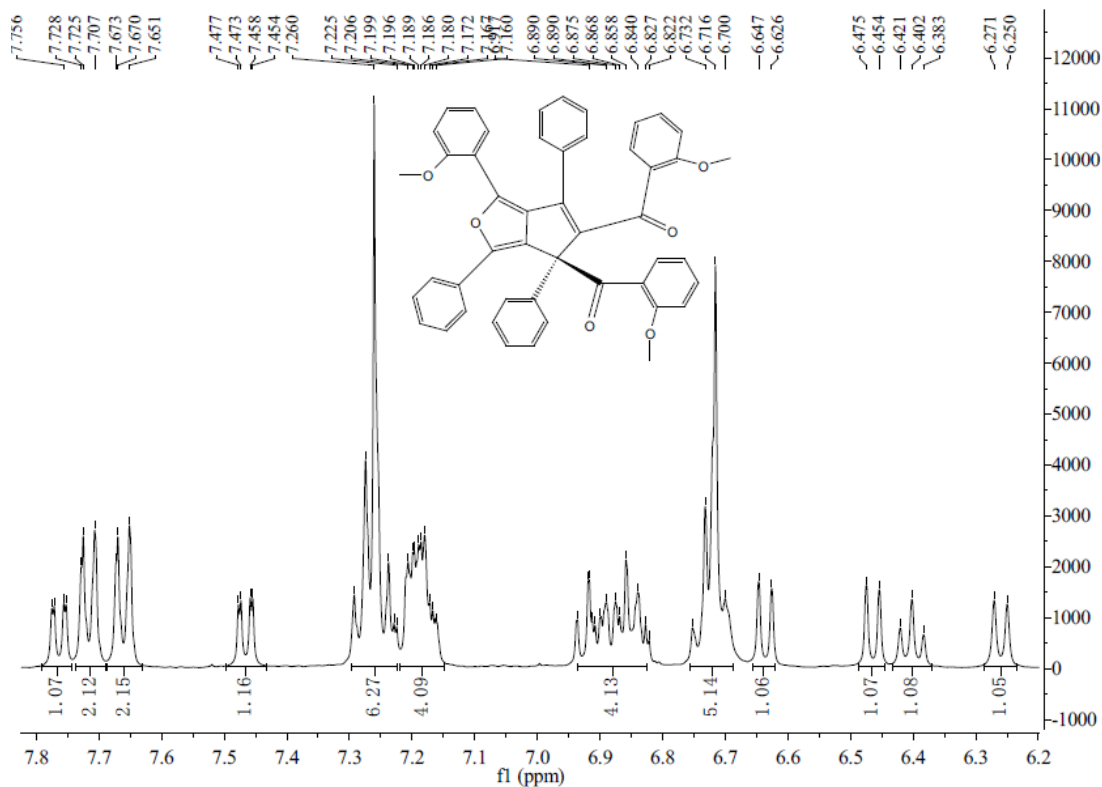

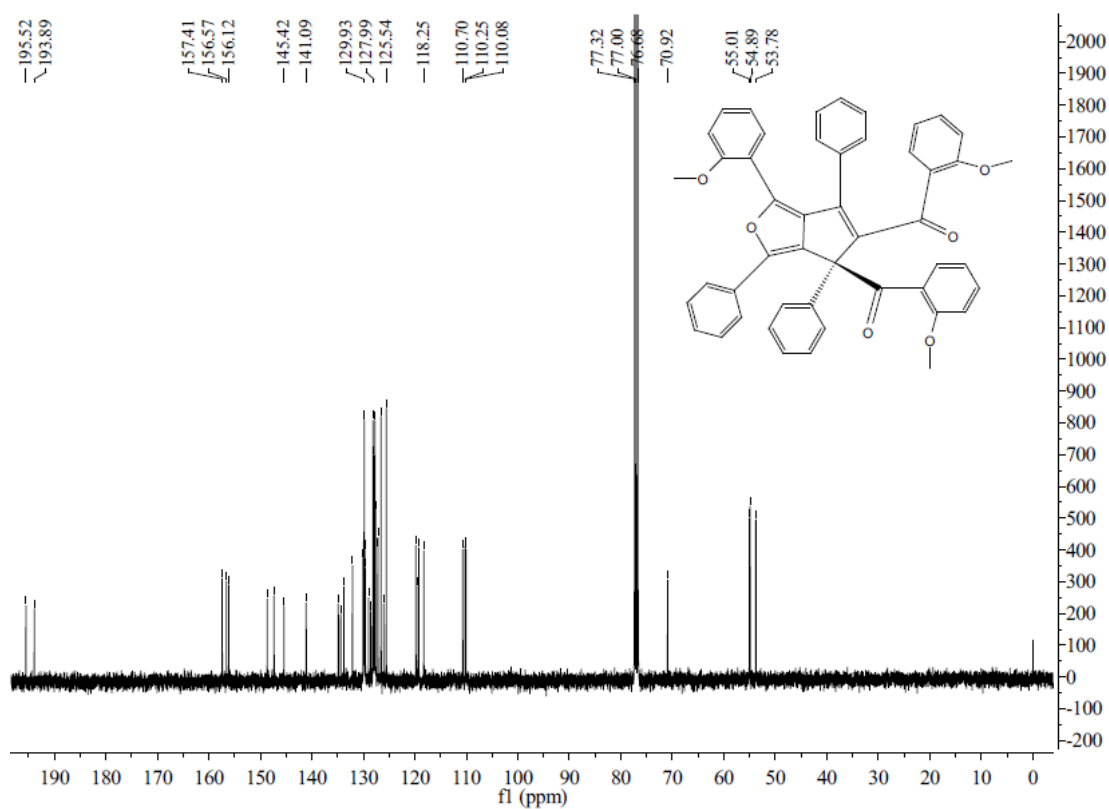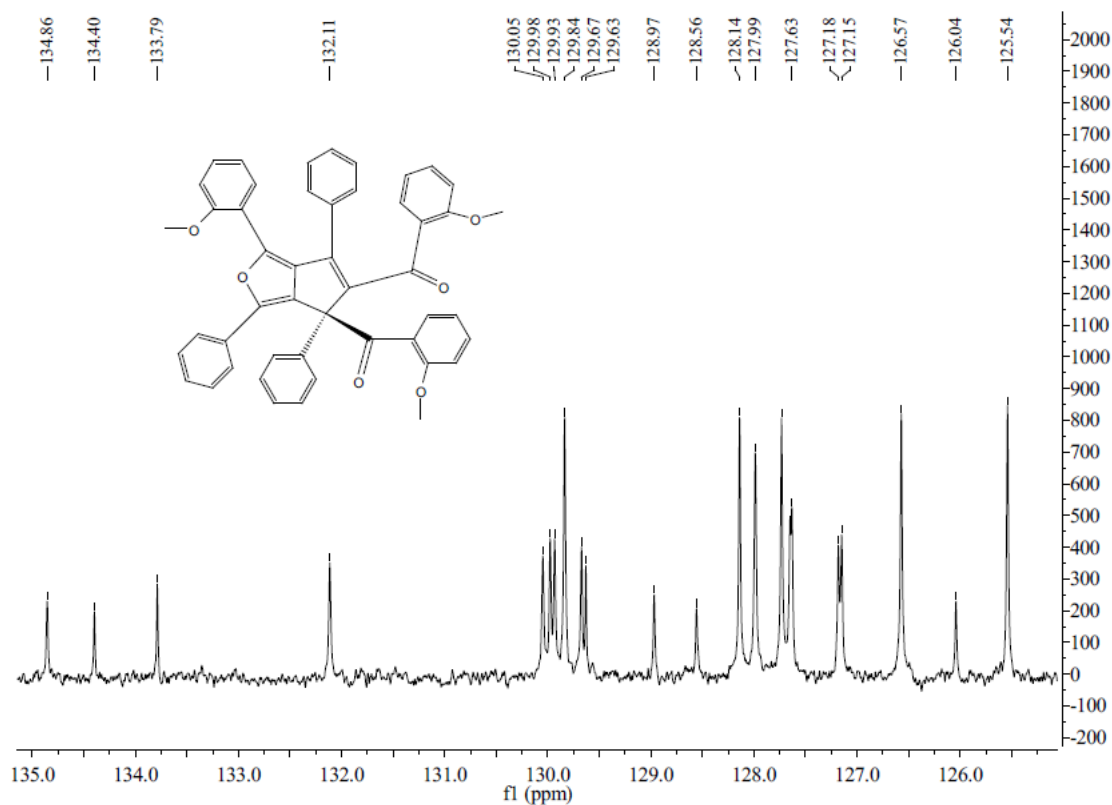

**2d:**

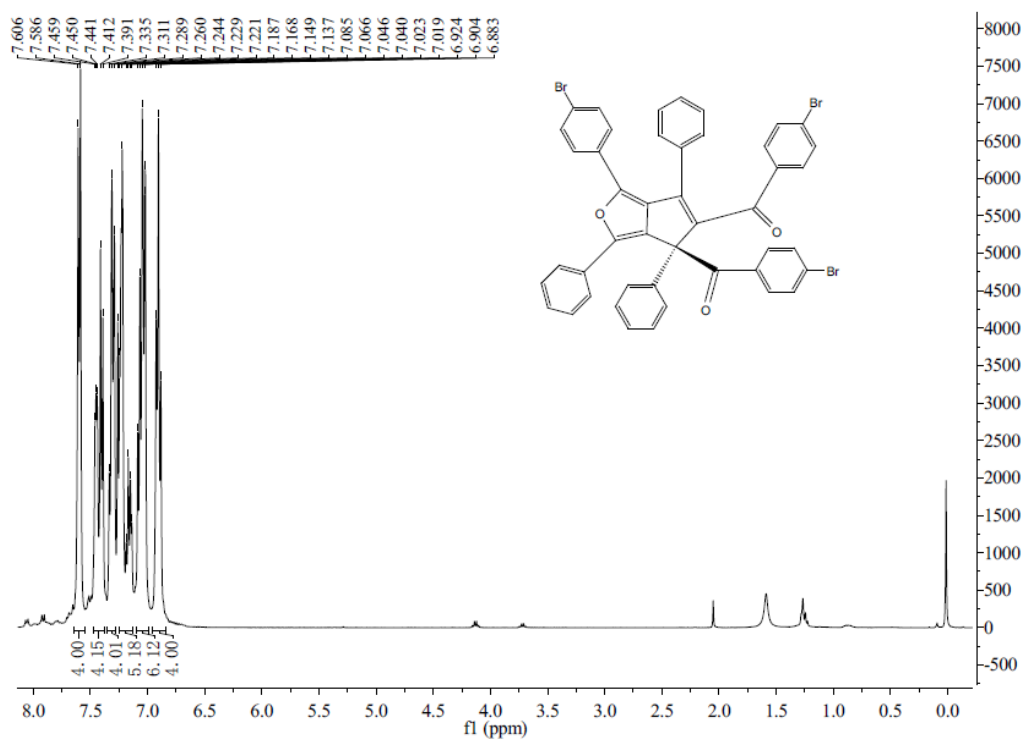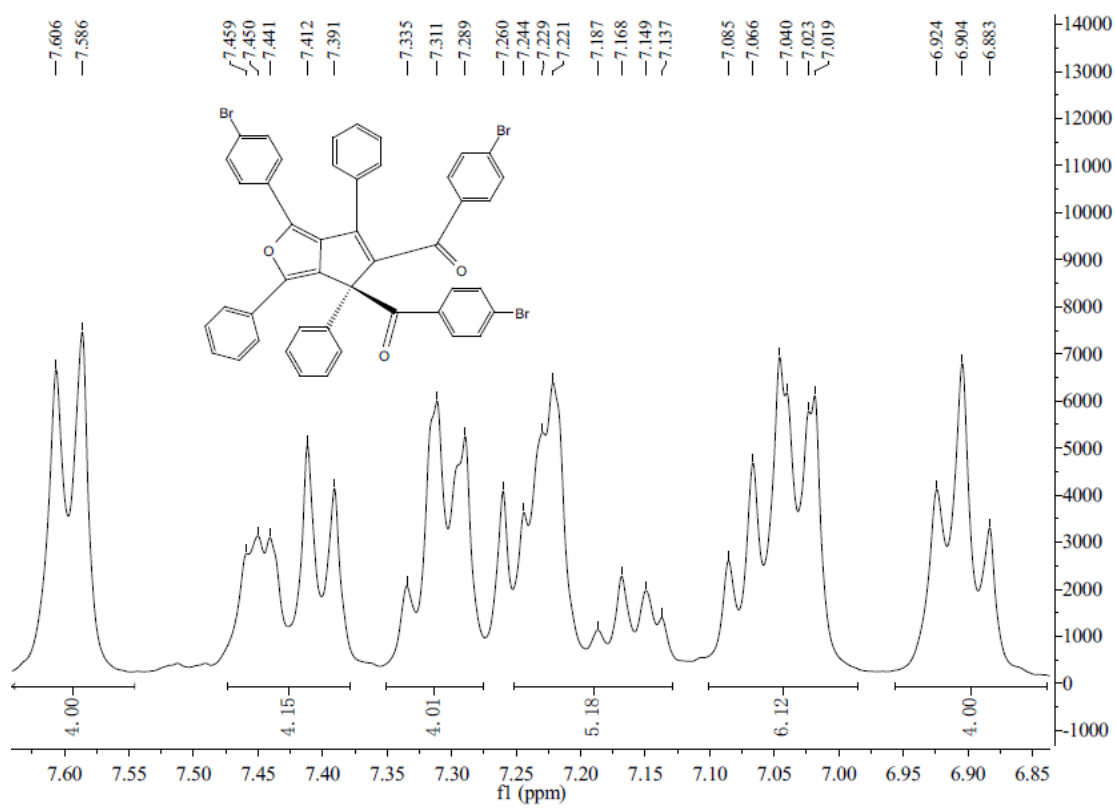

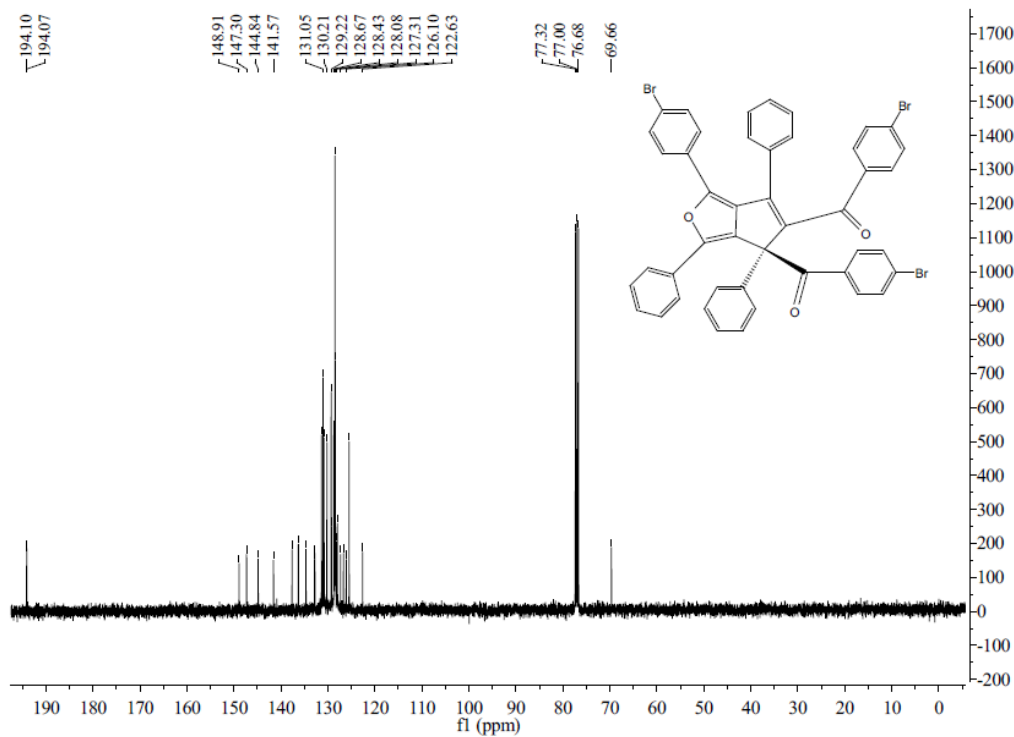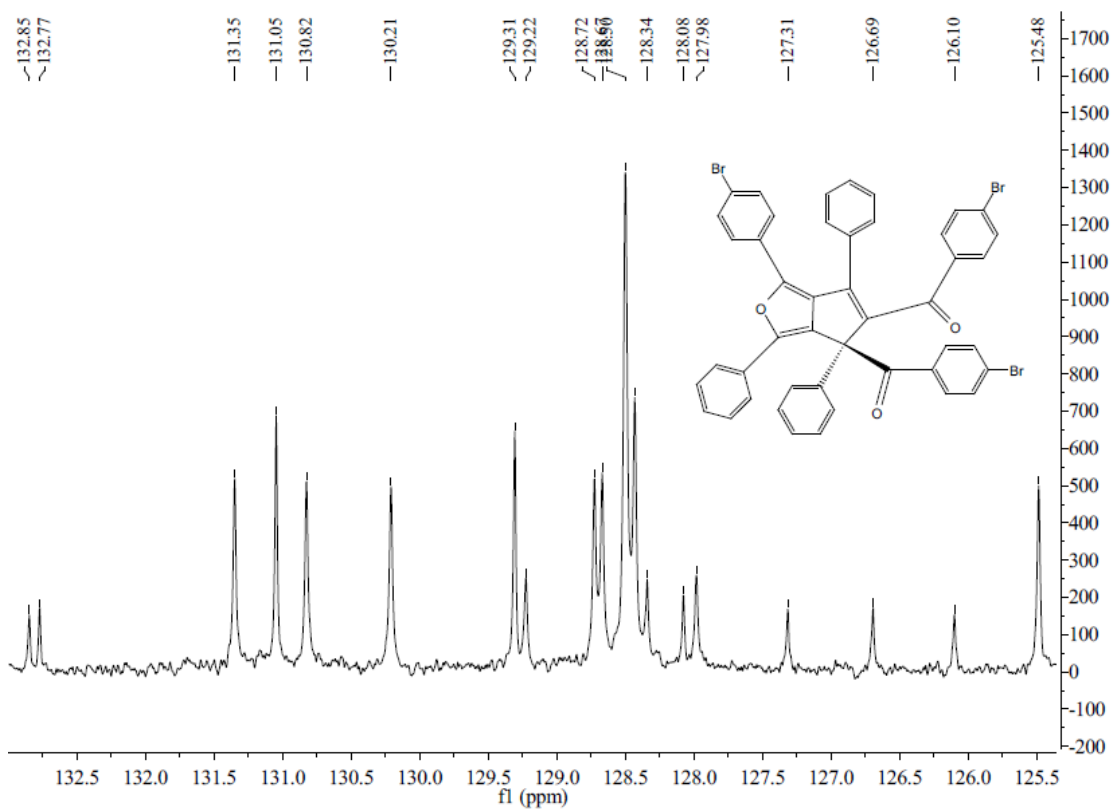

2e:

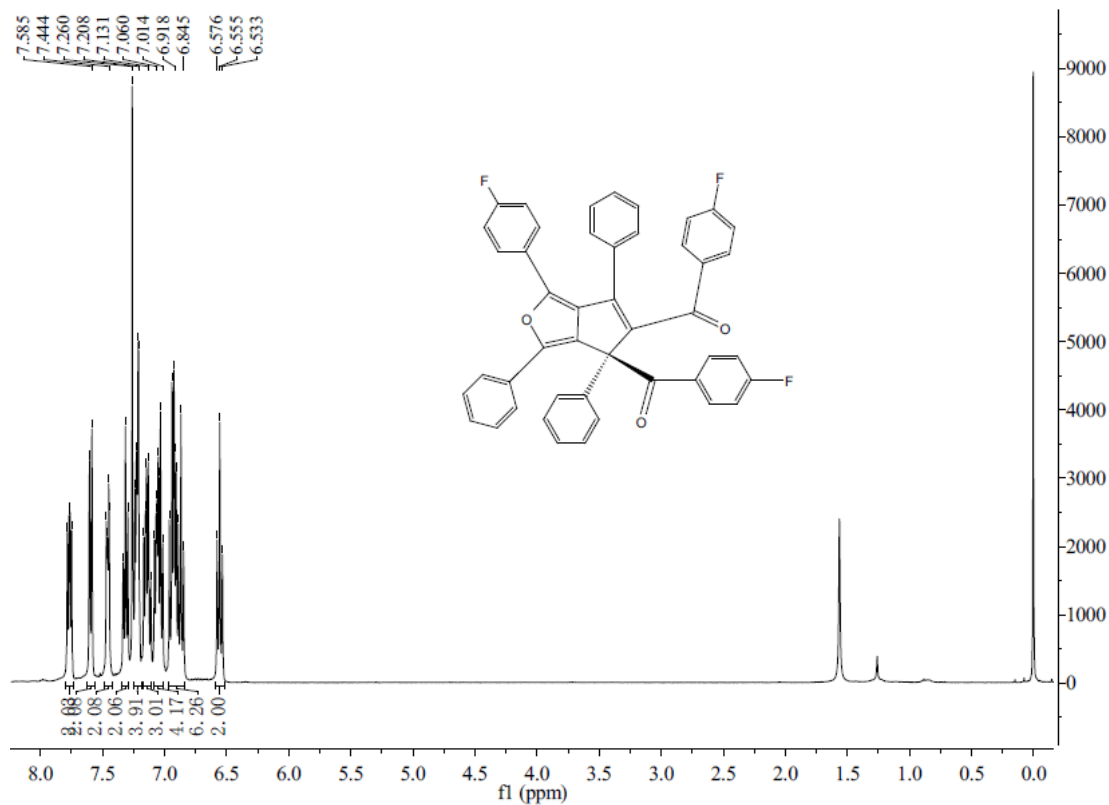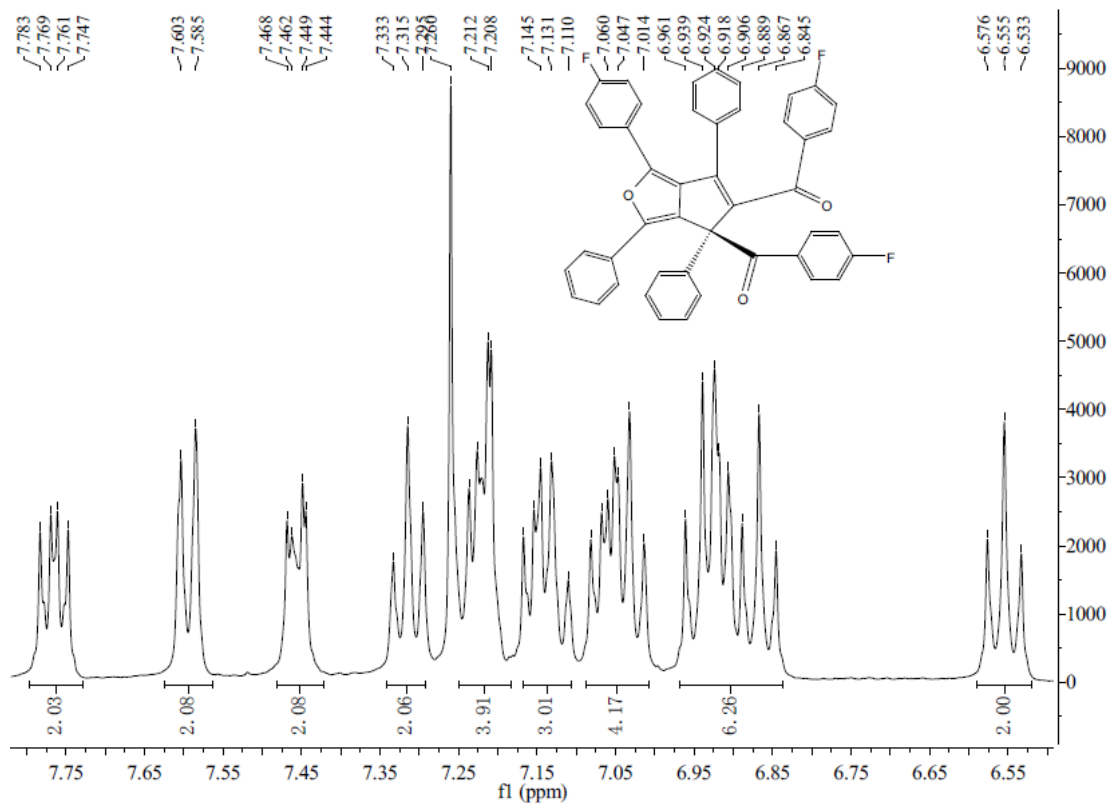

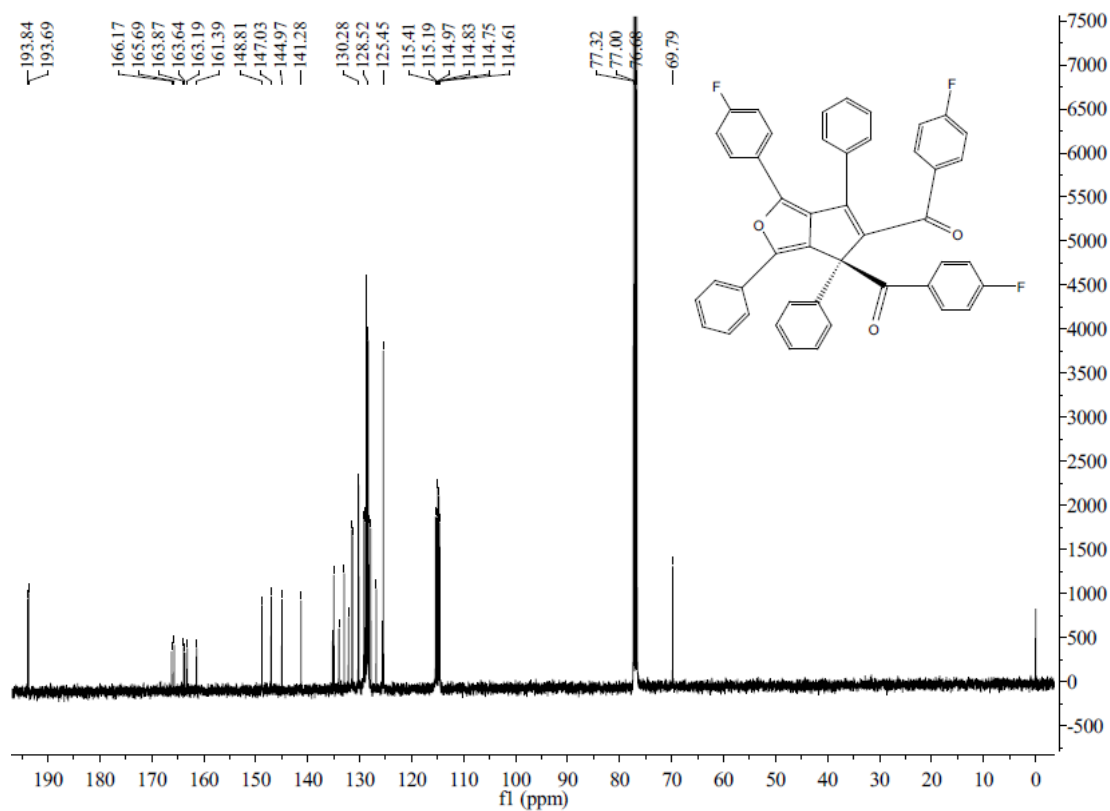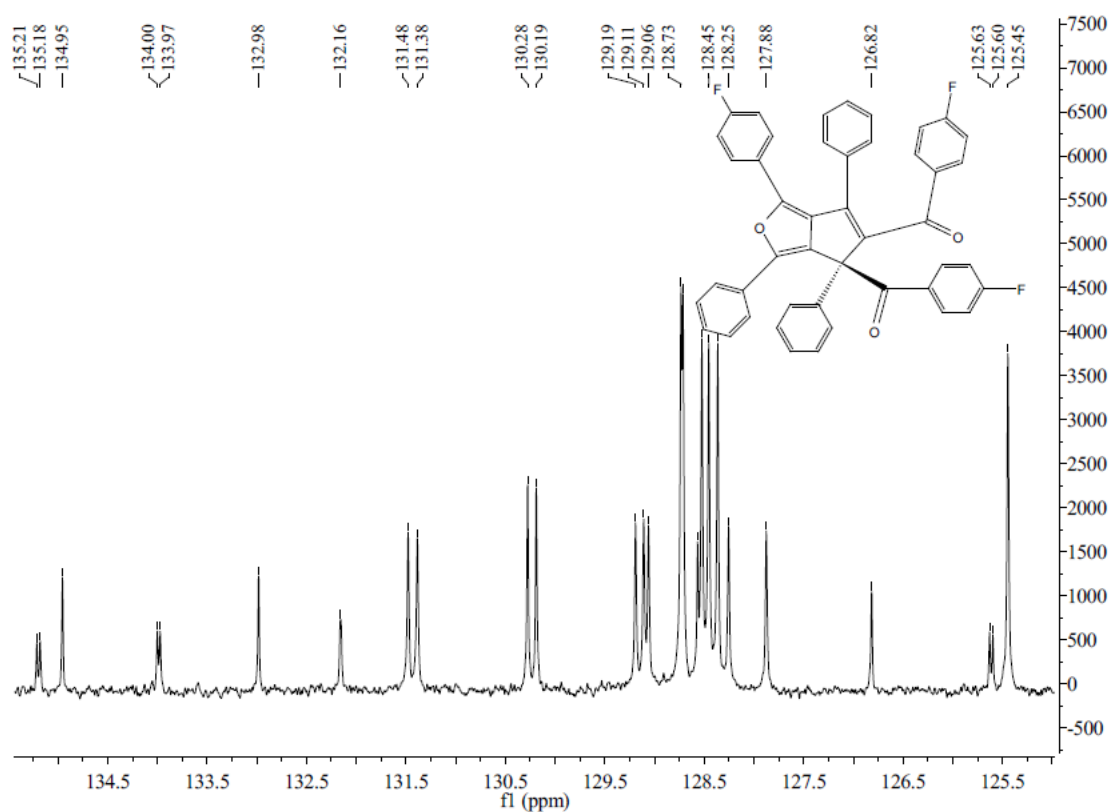

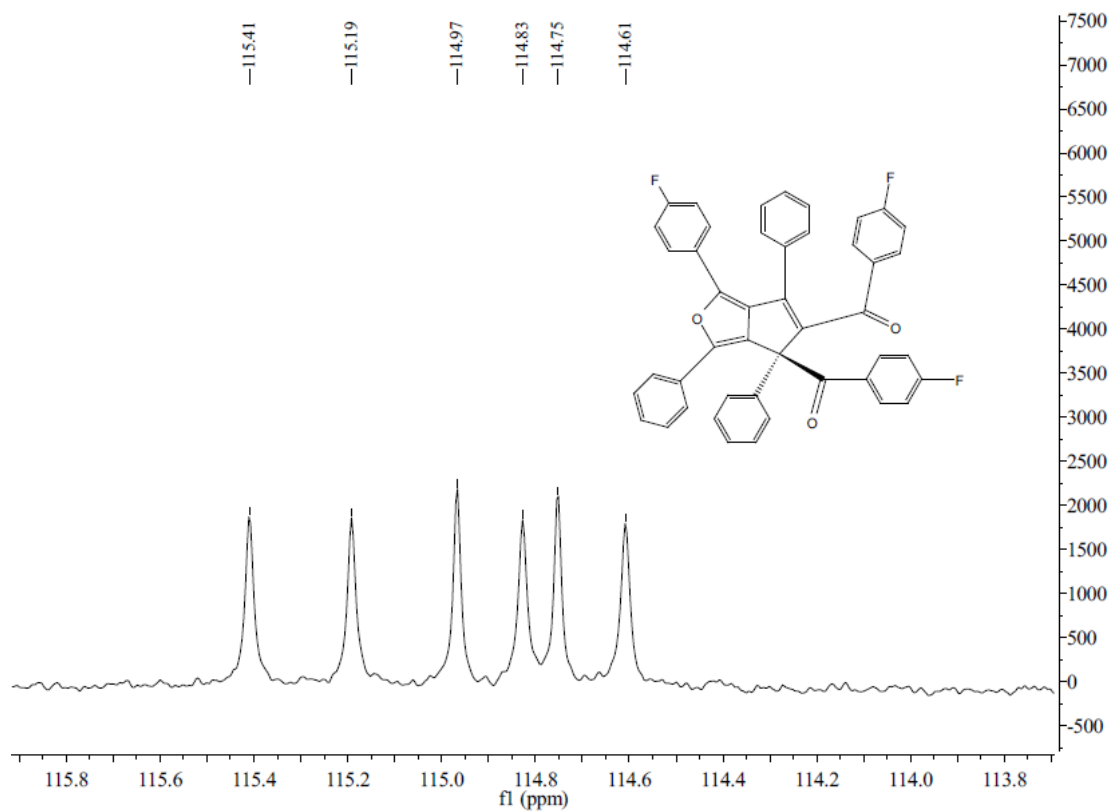

**2f:**

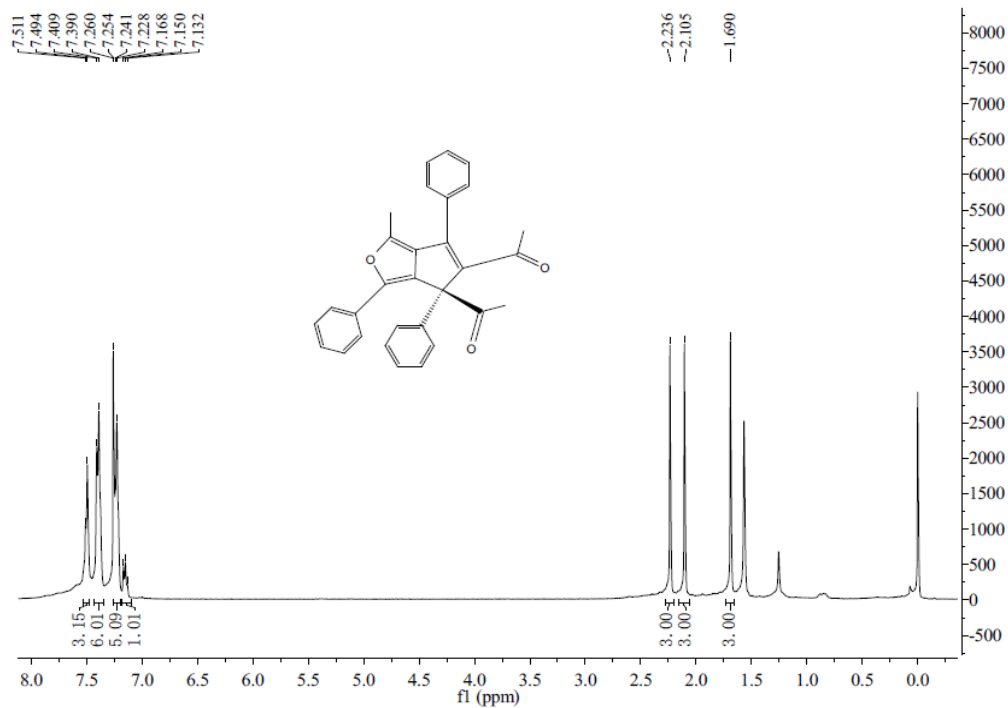

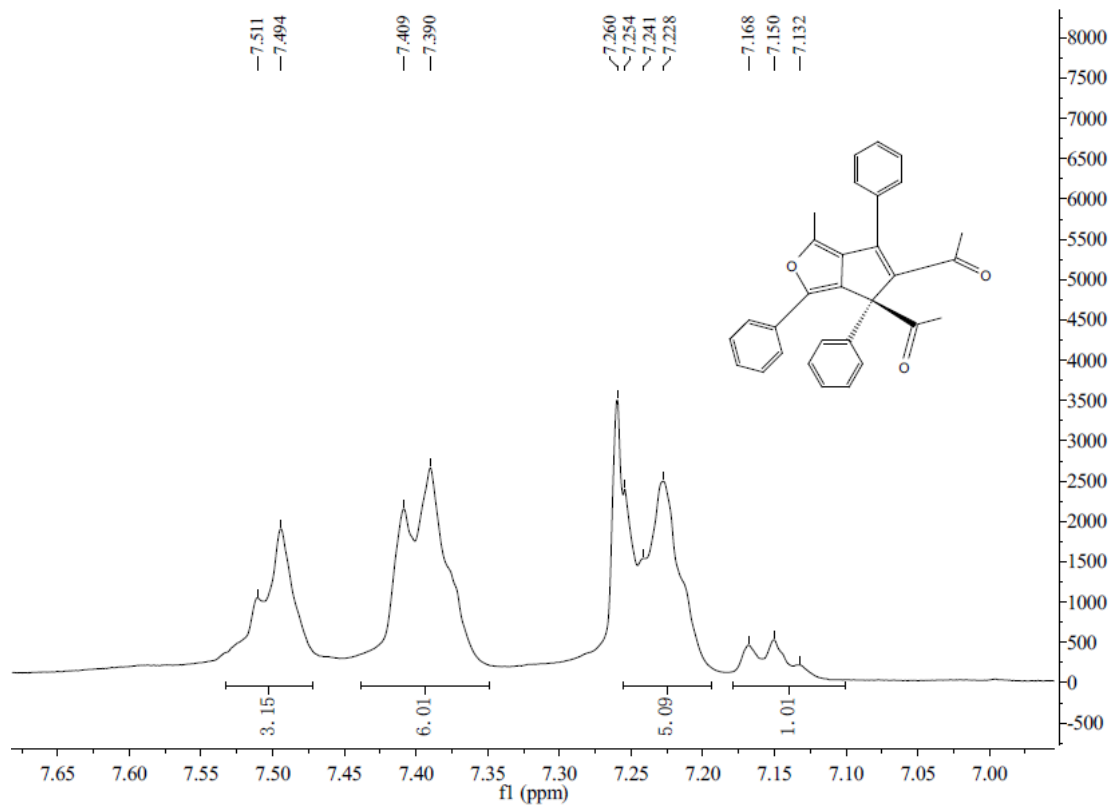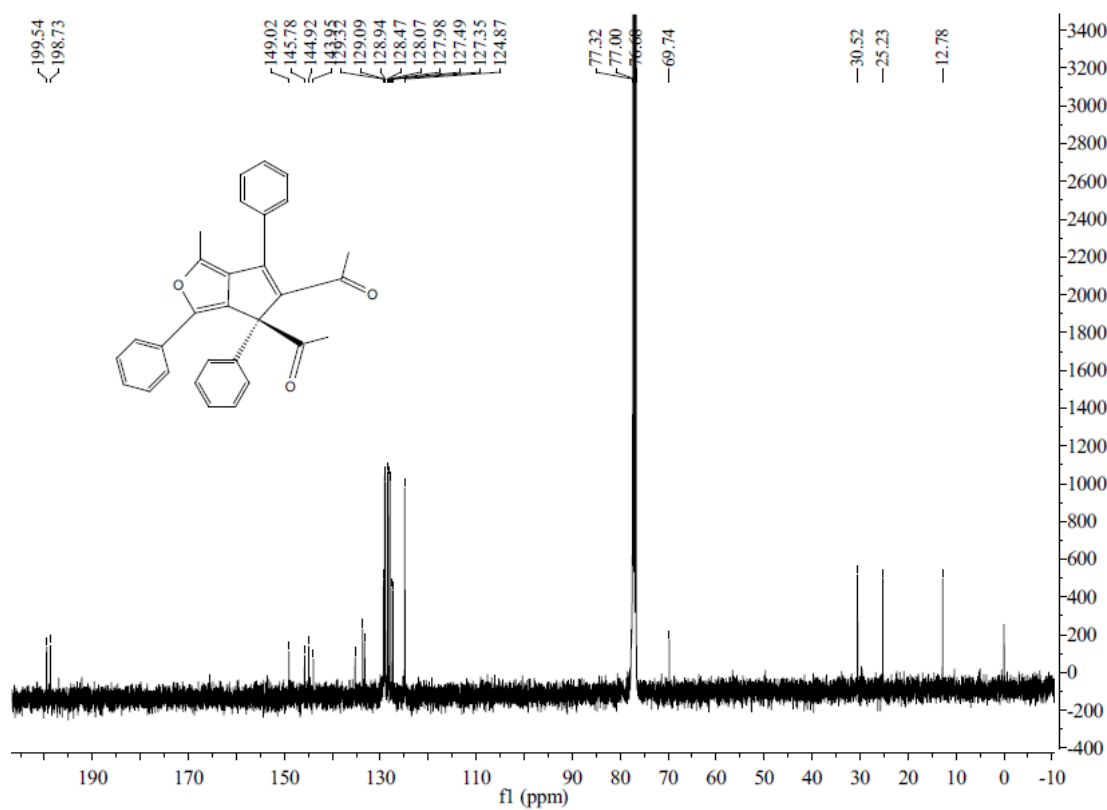



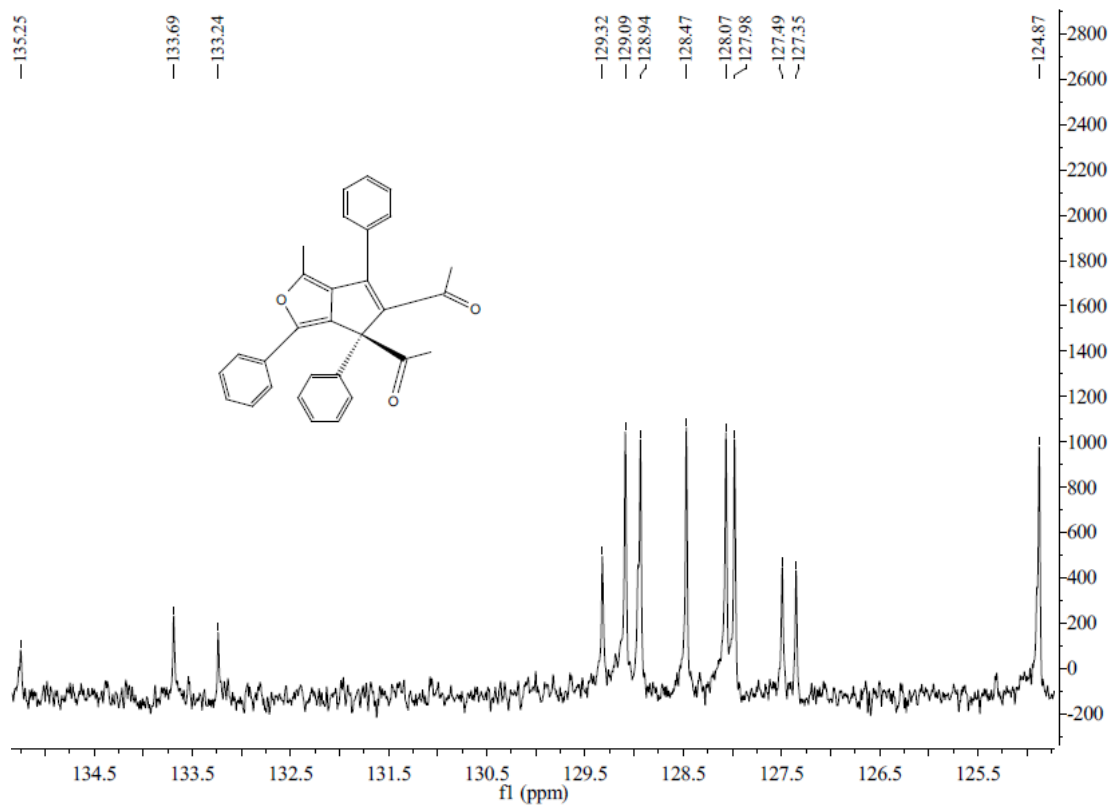

**2g:**

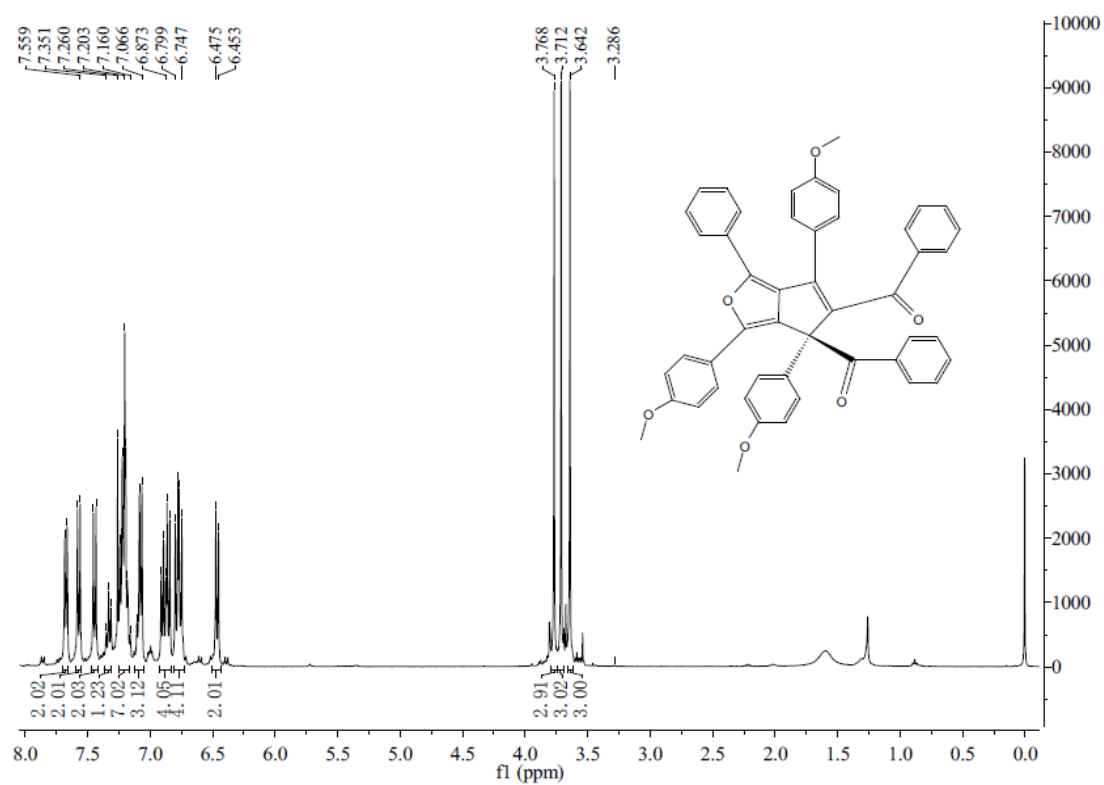

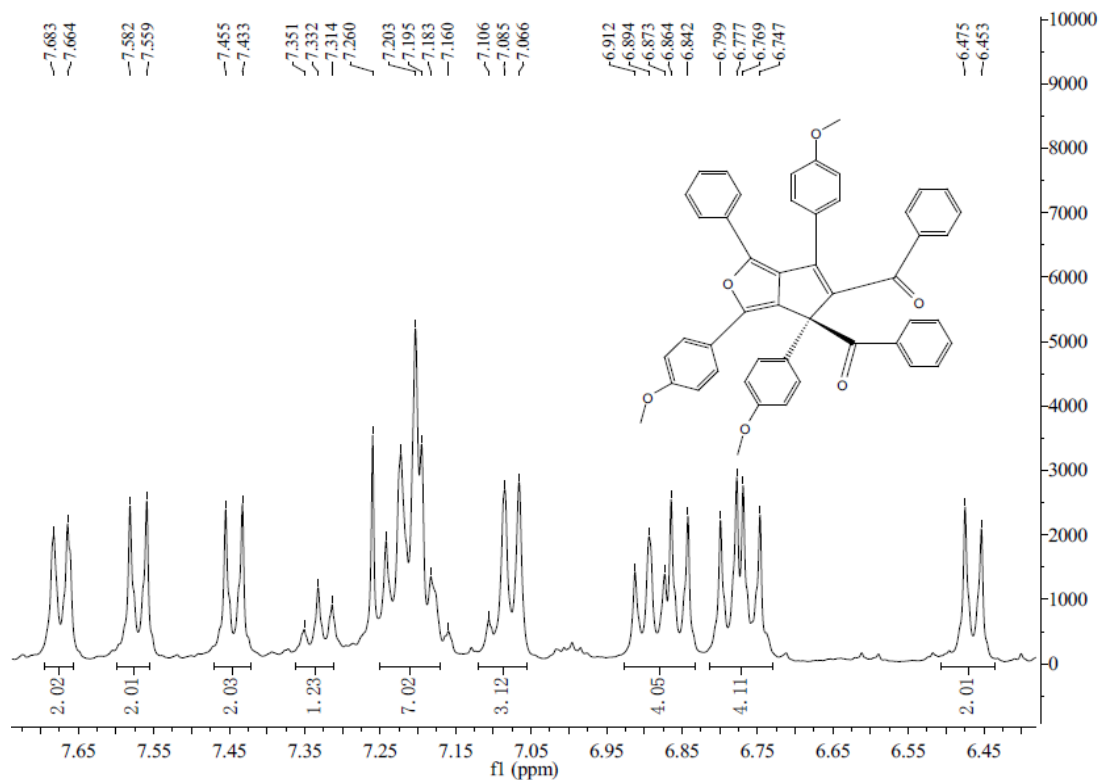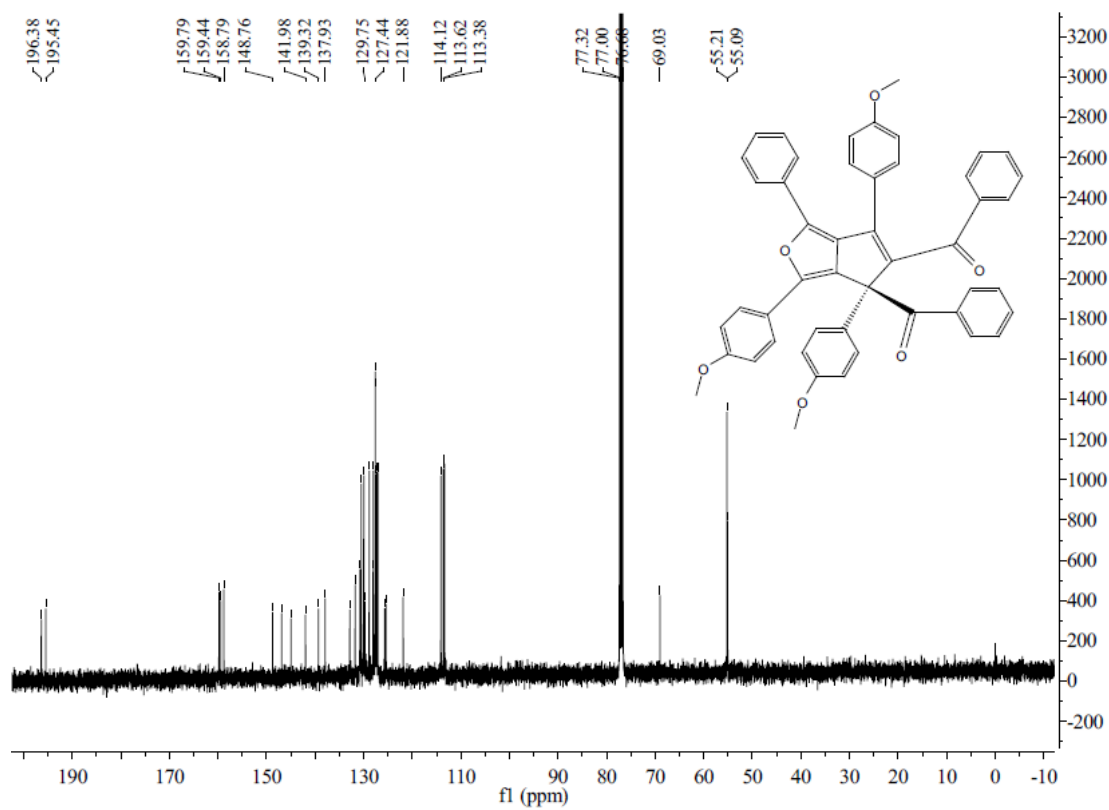

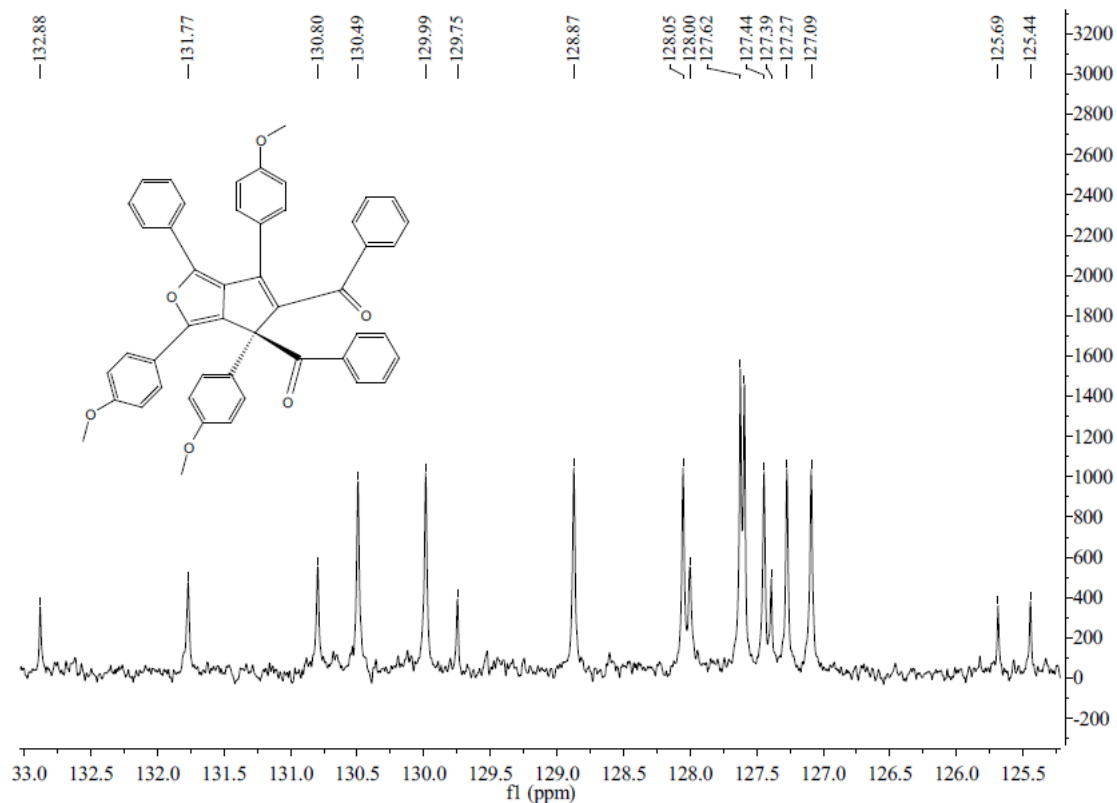

**2h:**

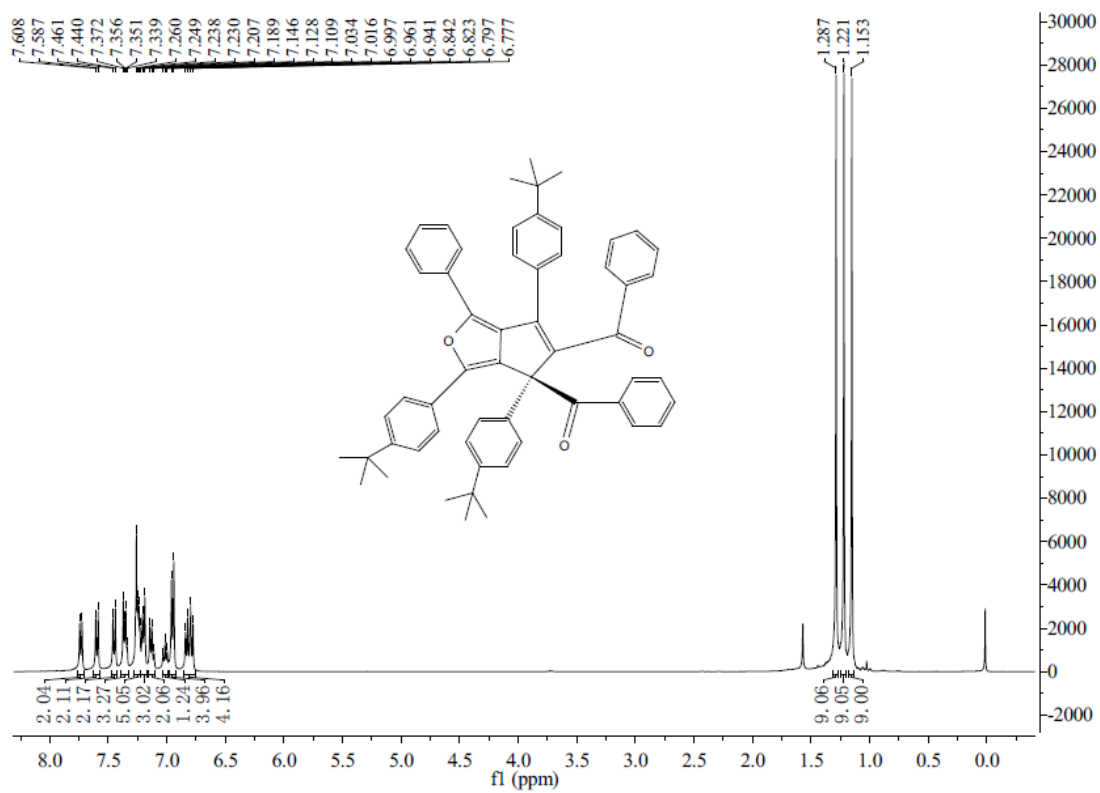

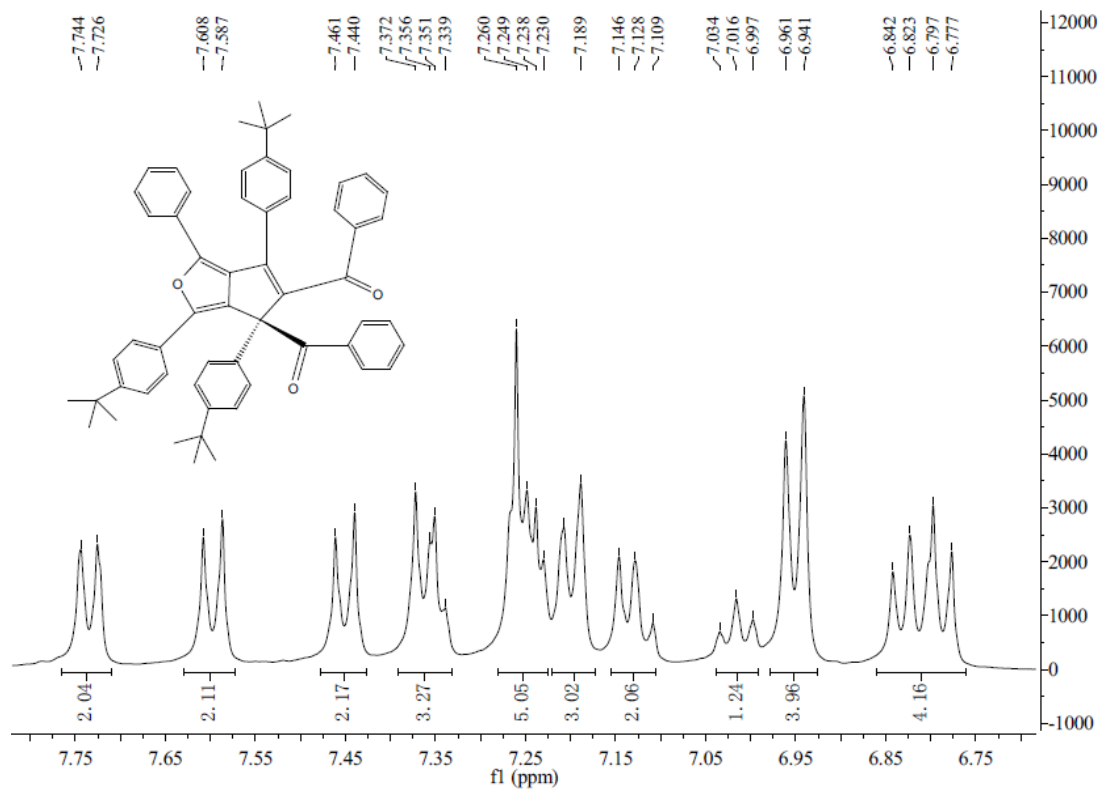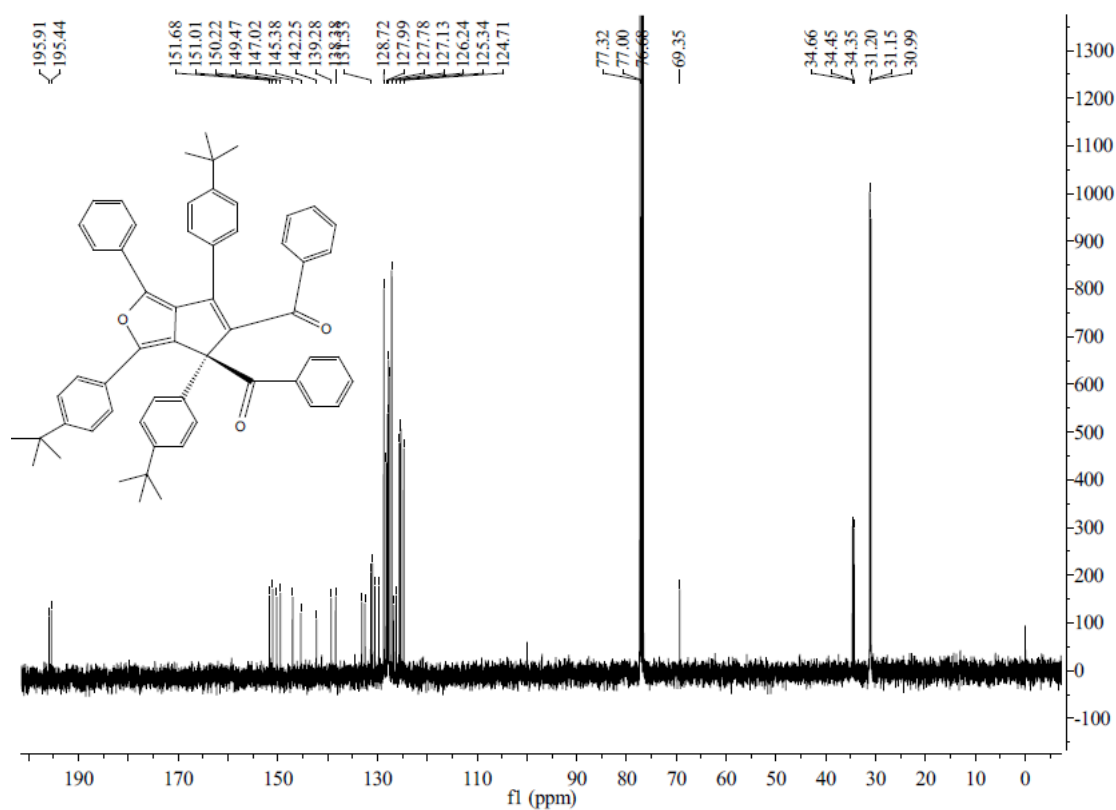

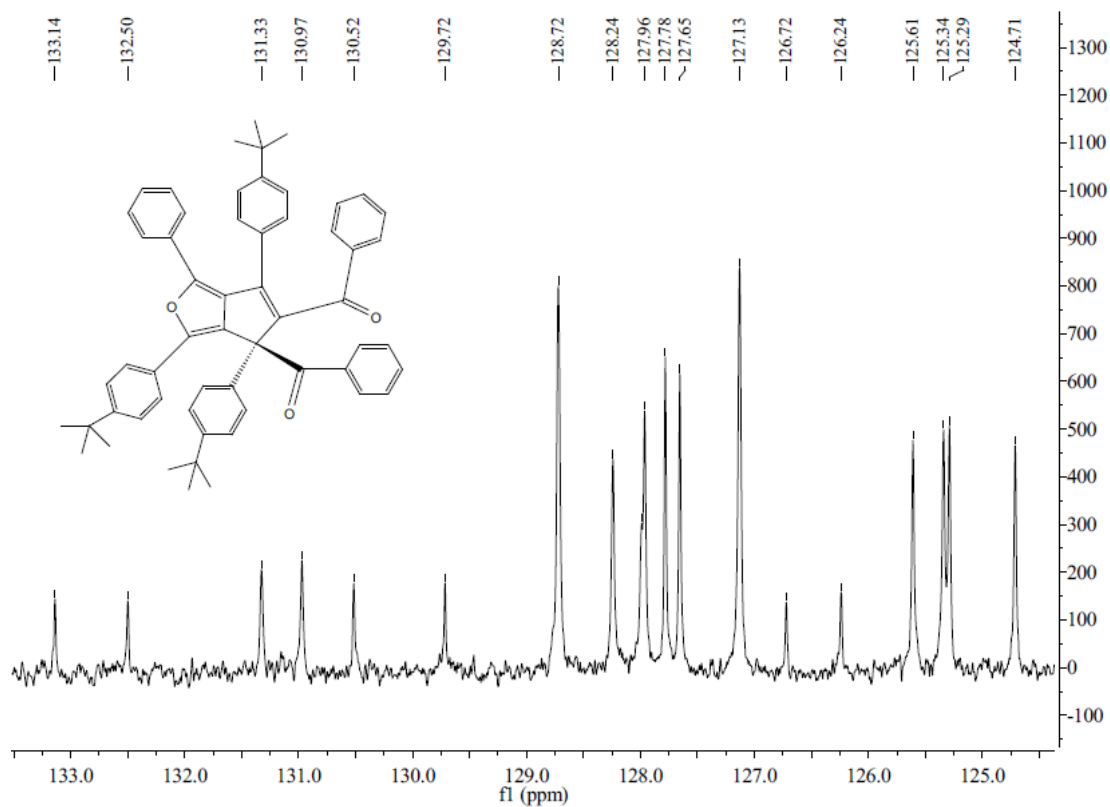

**2i:**

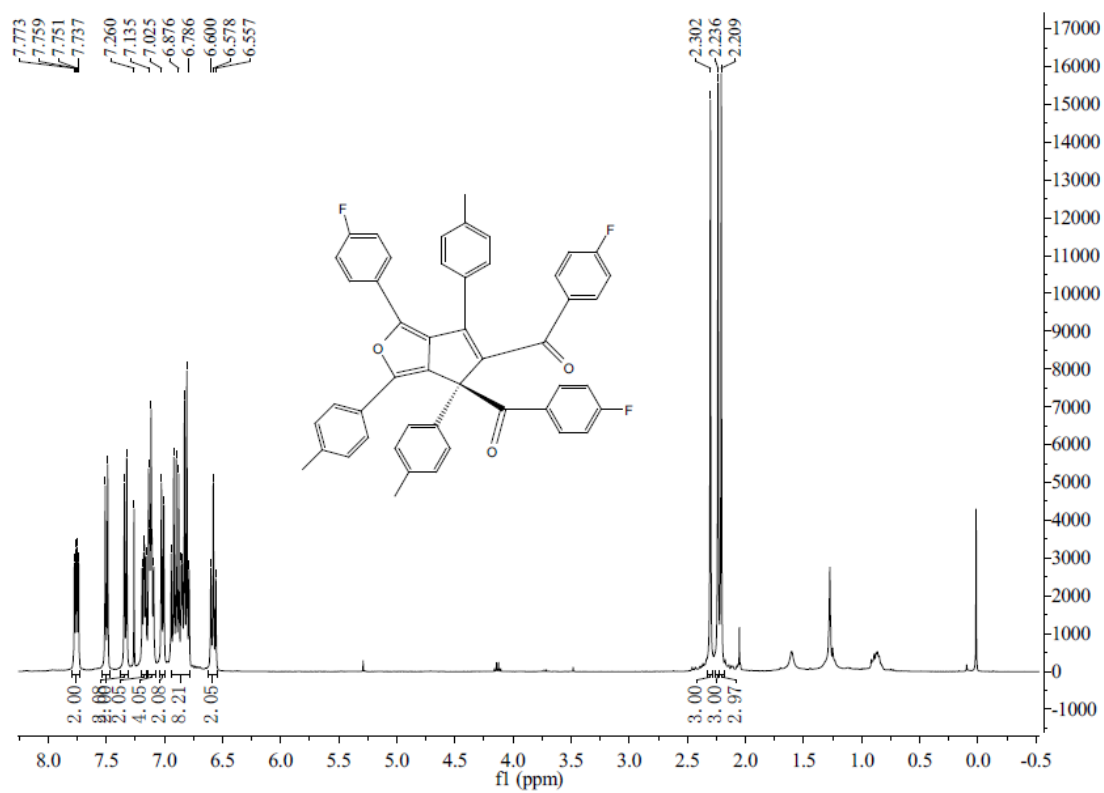

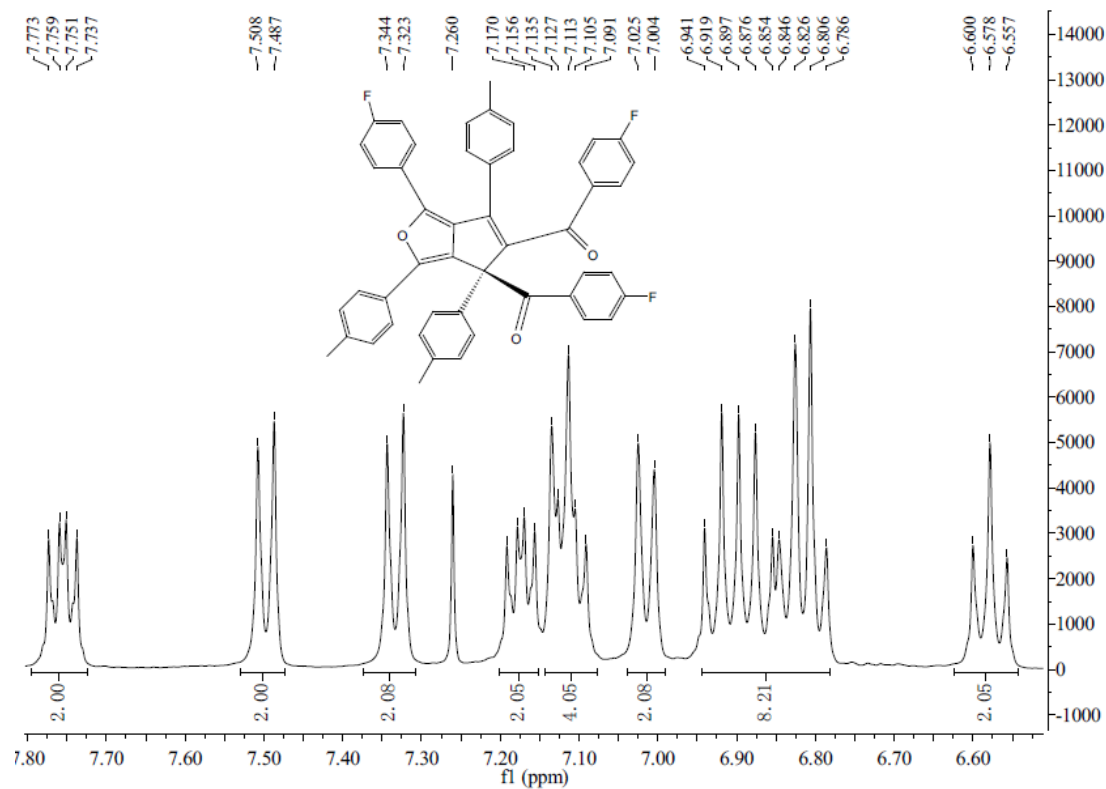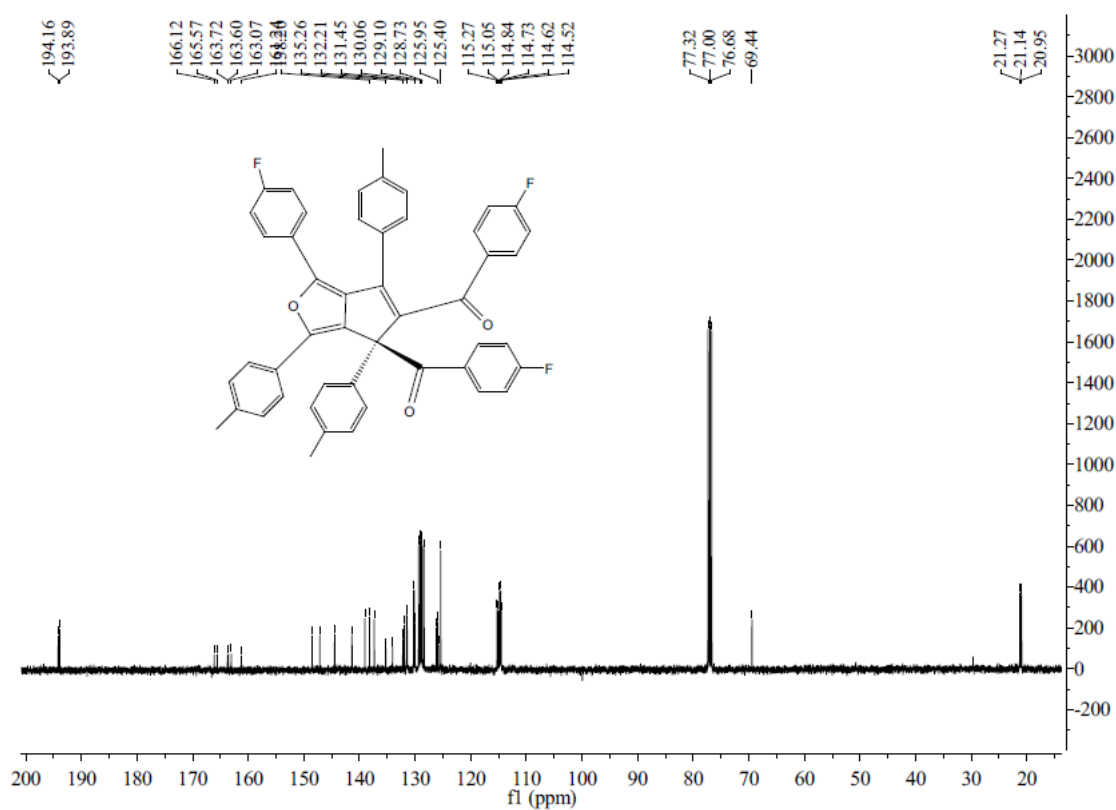

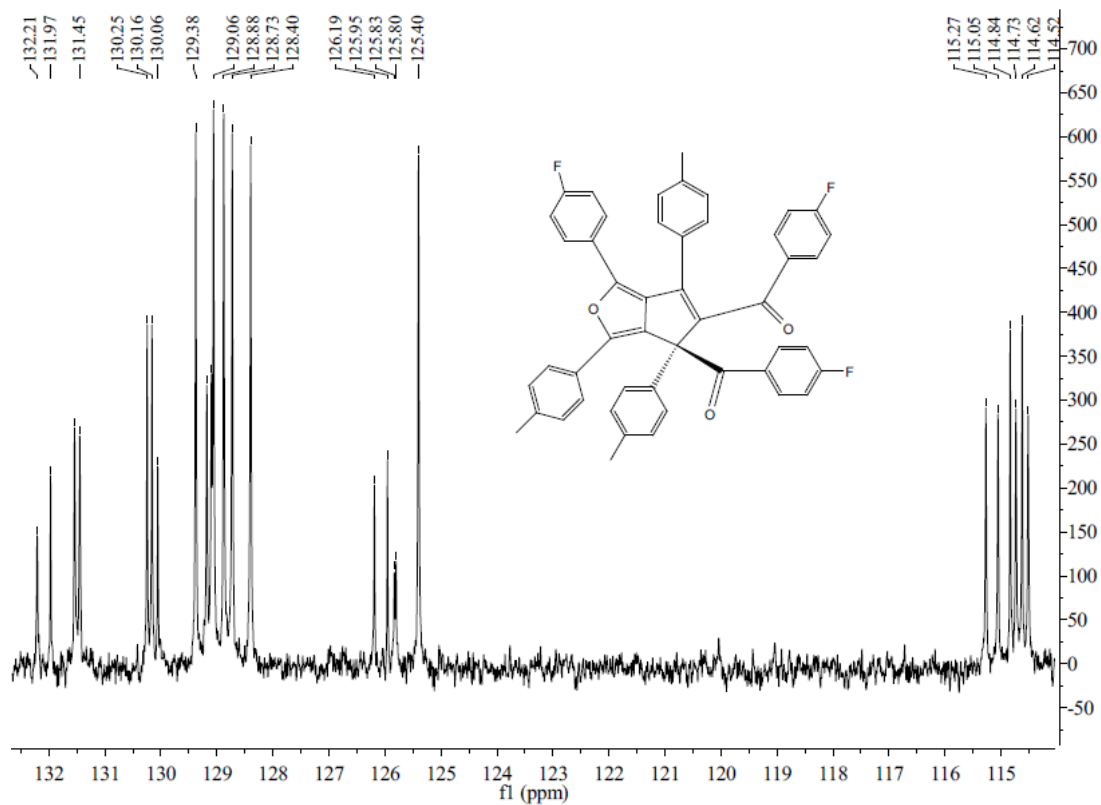

**2j:**

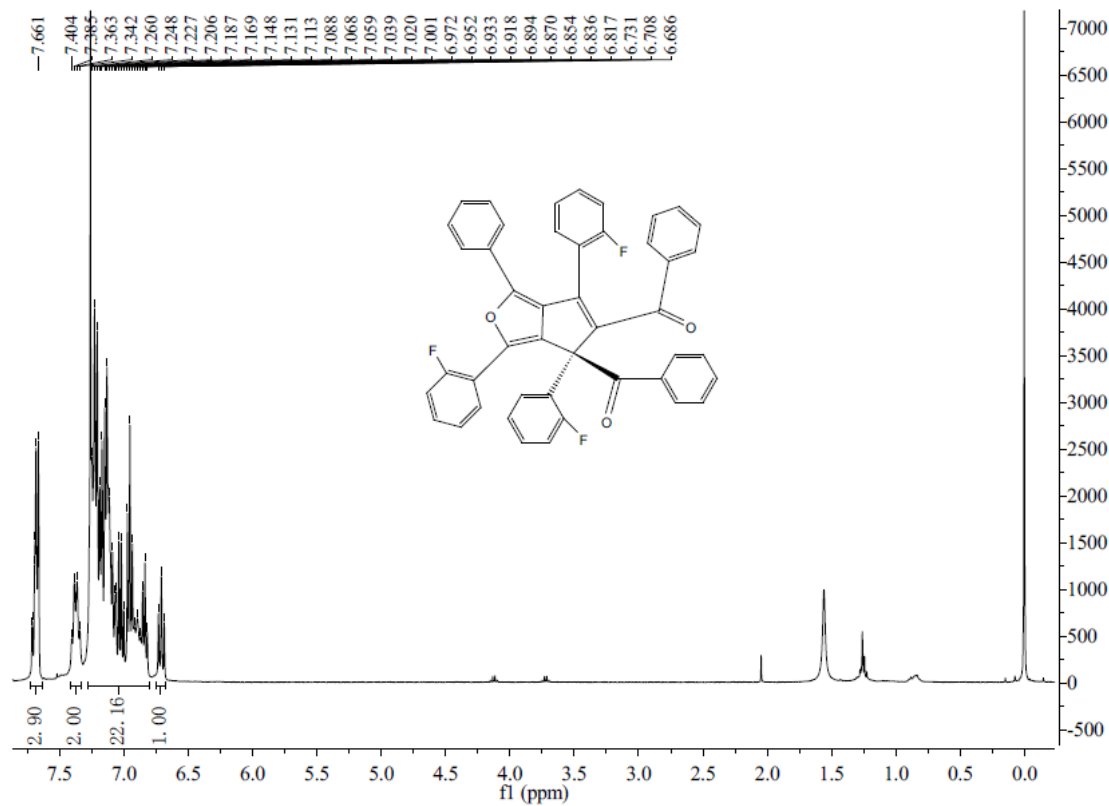

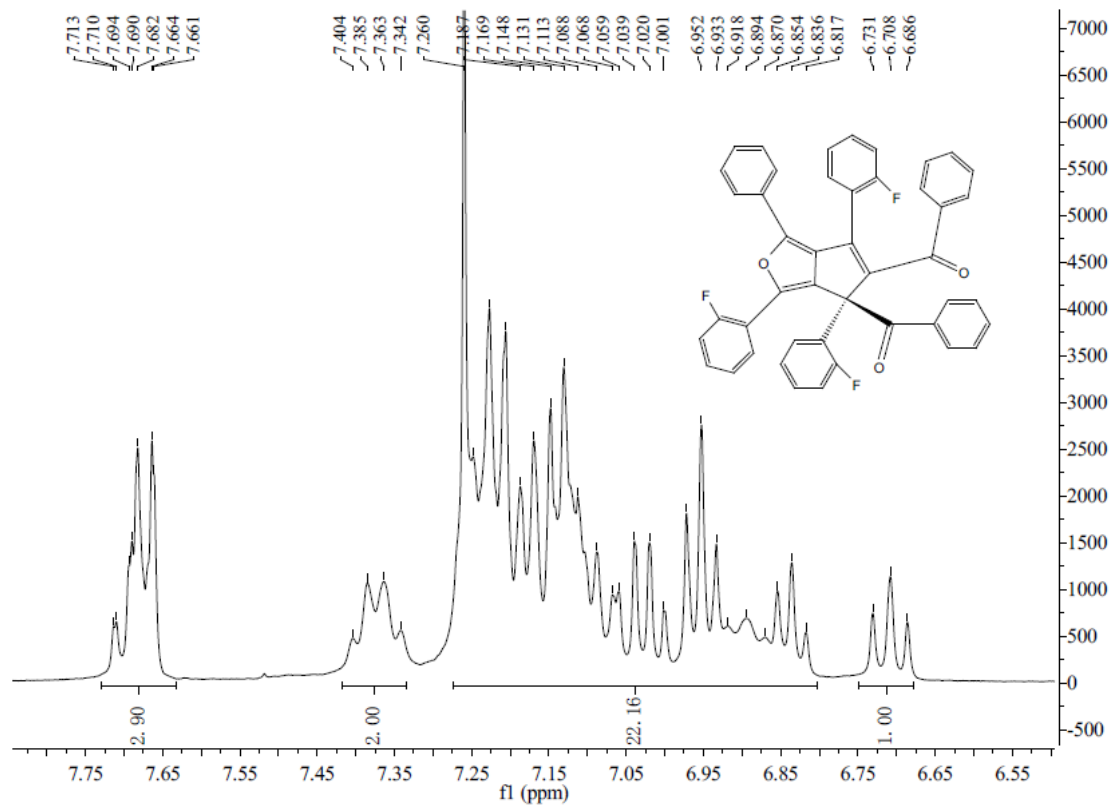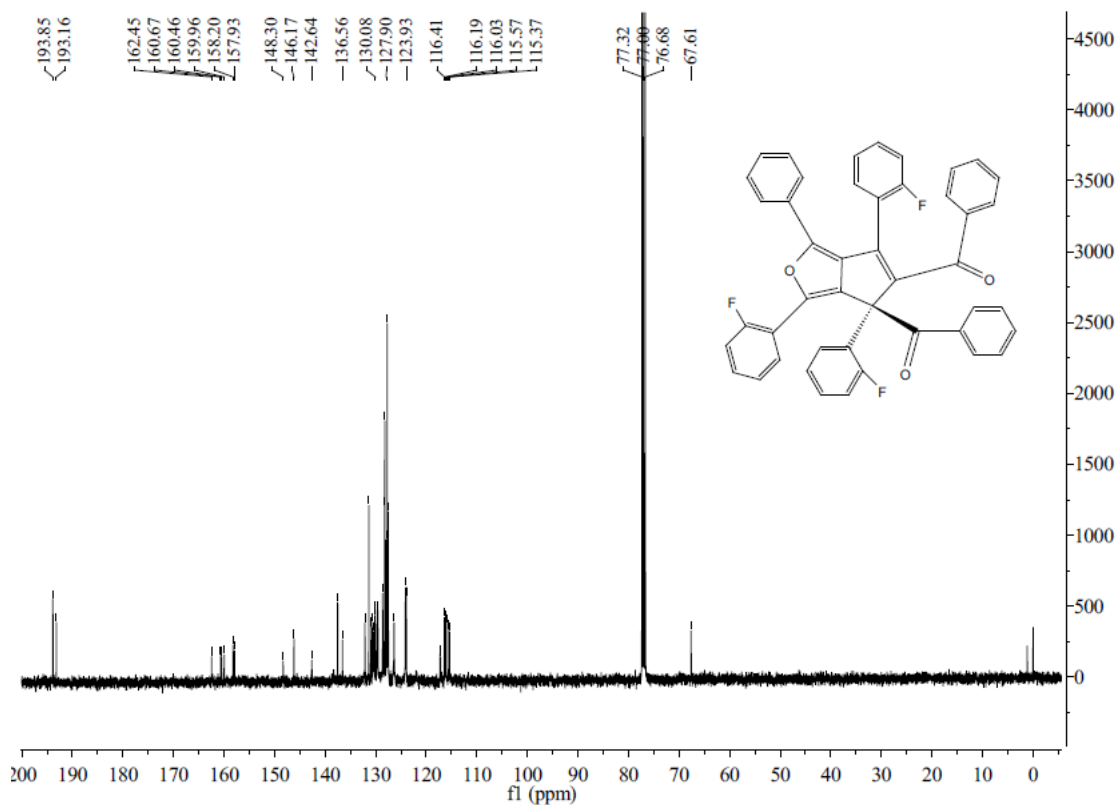



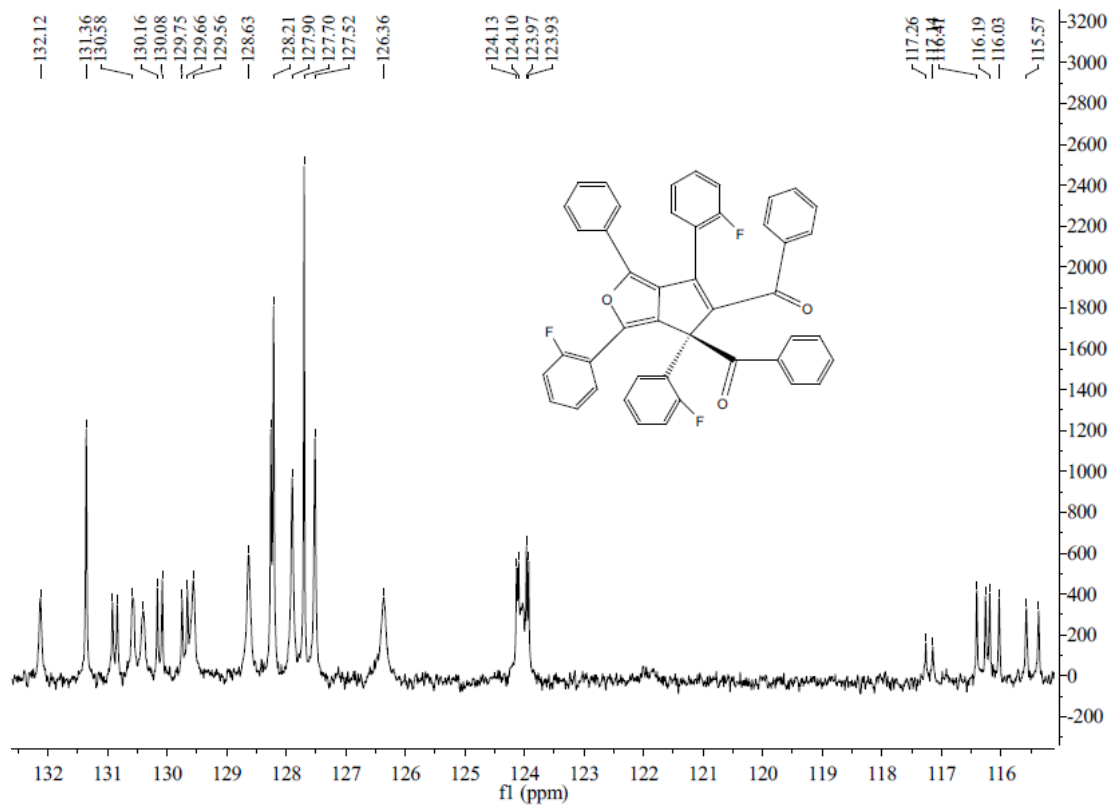

**2k:**

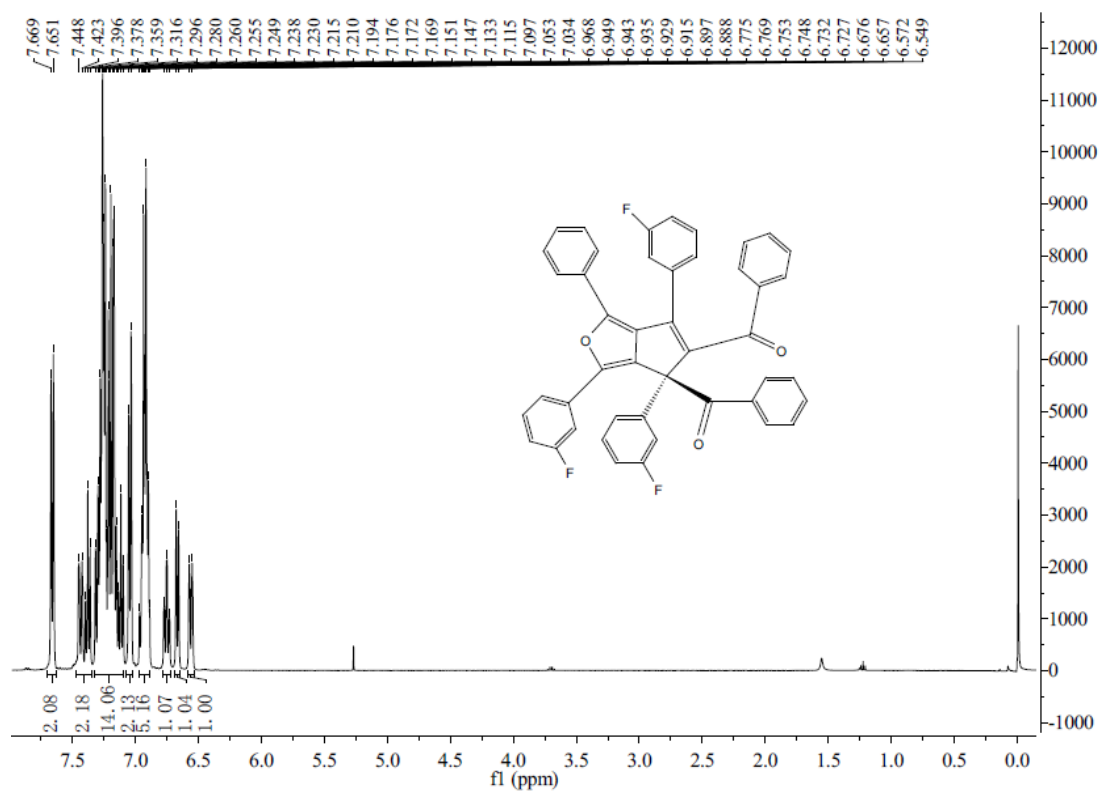

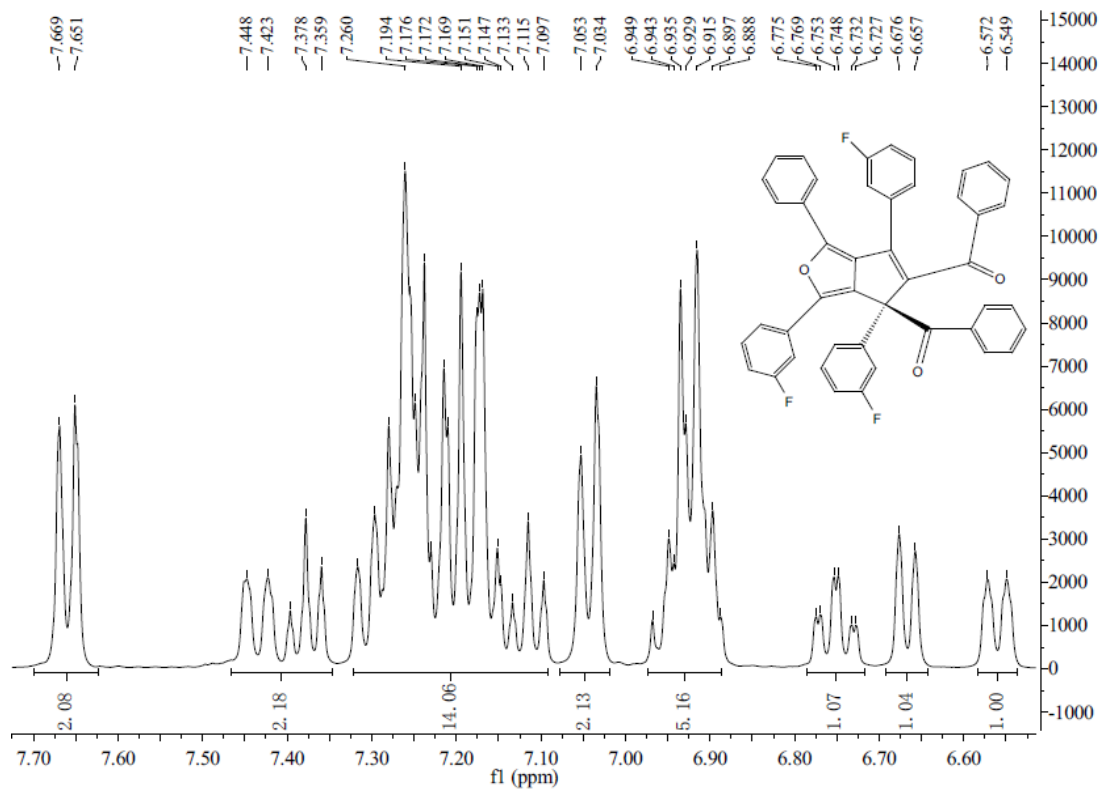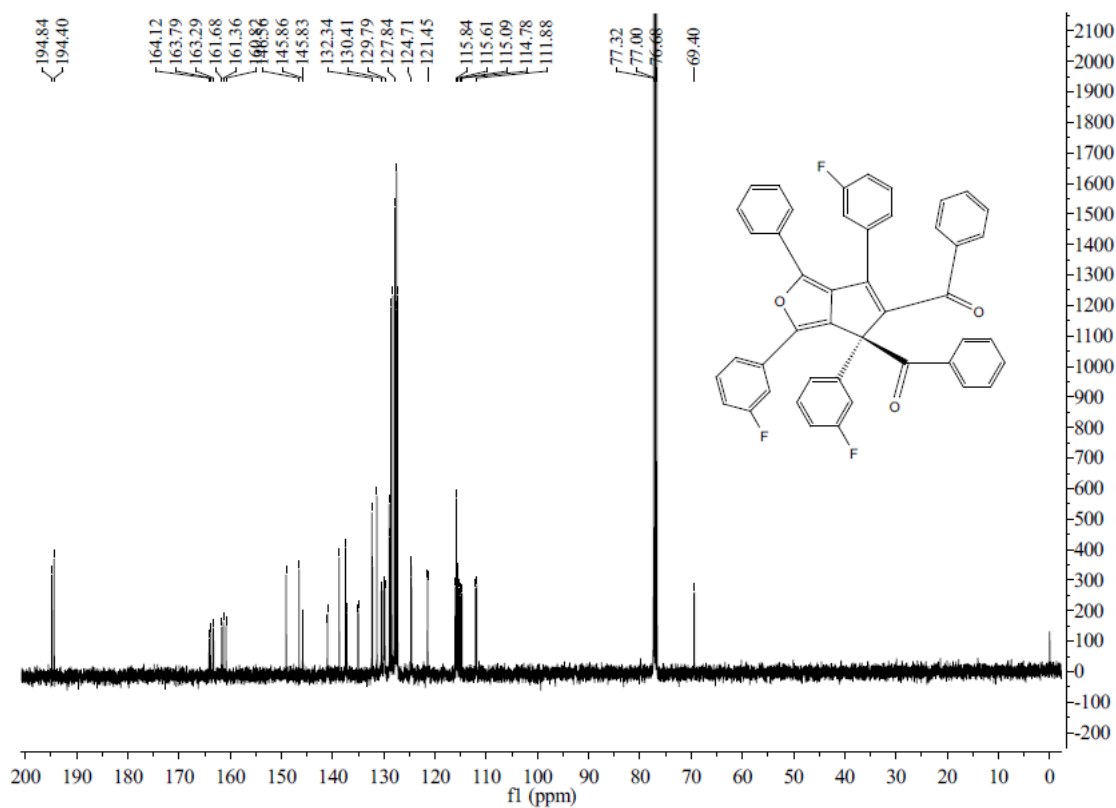

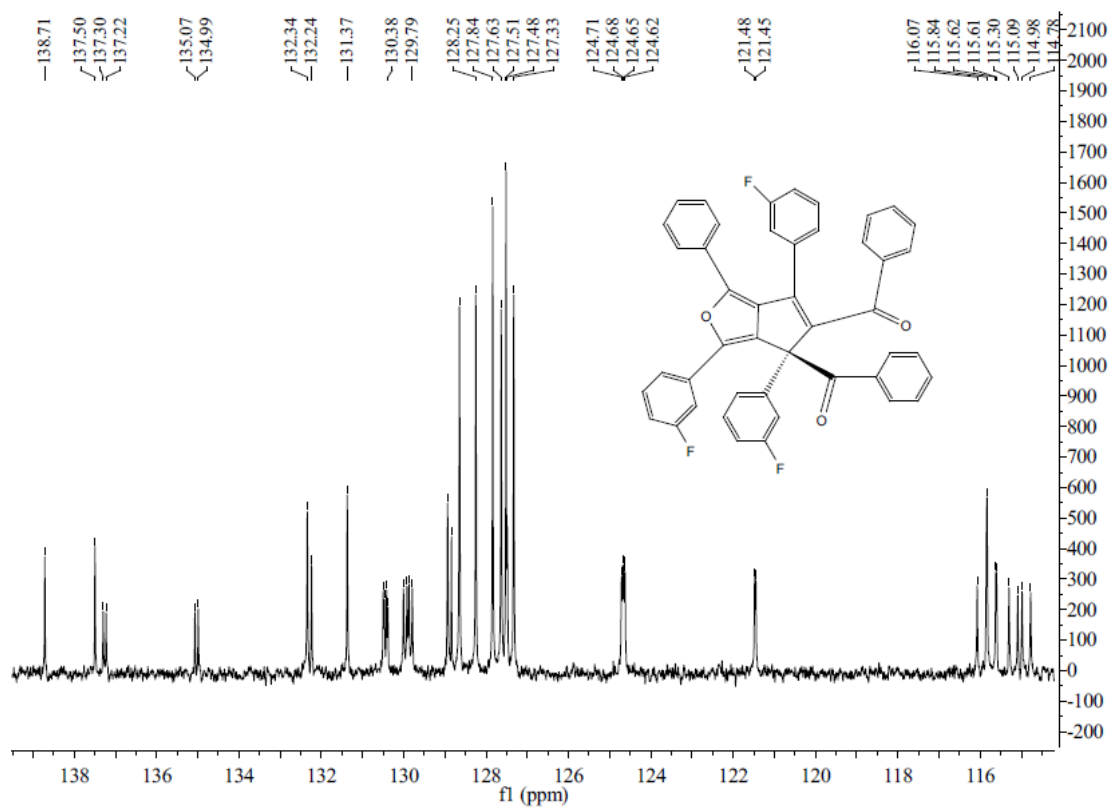

**2l:**

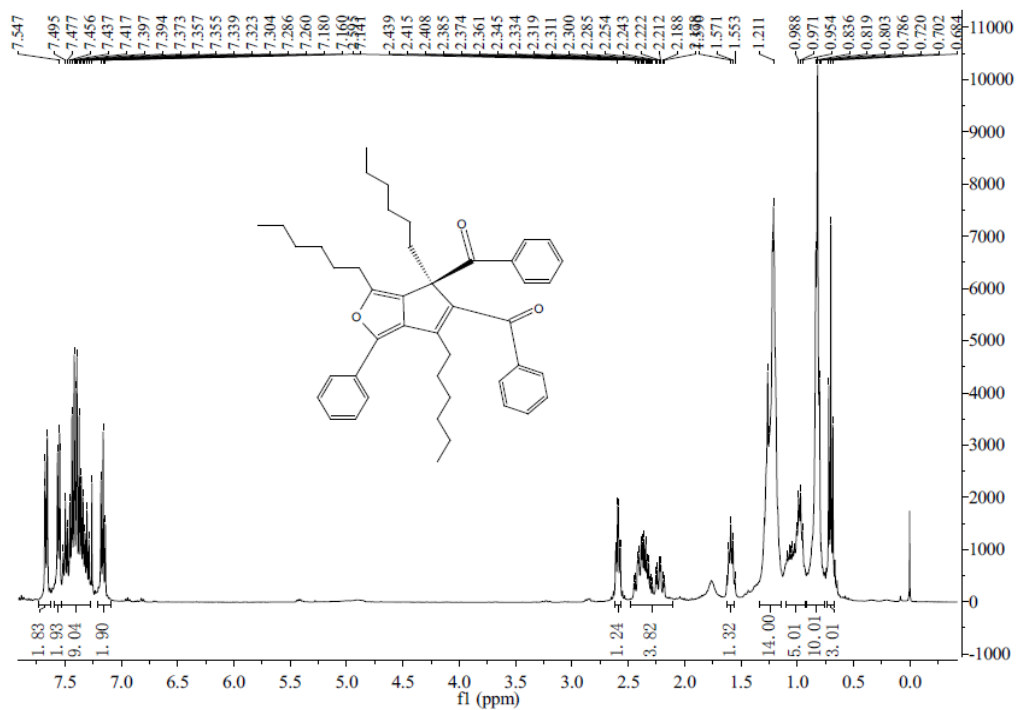

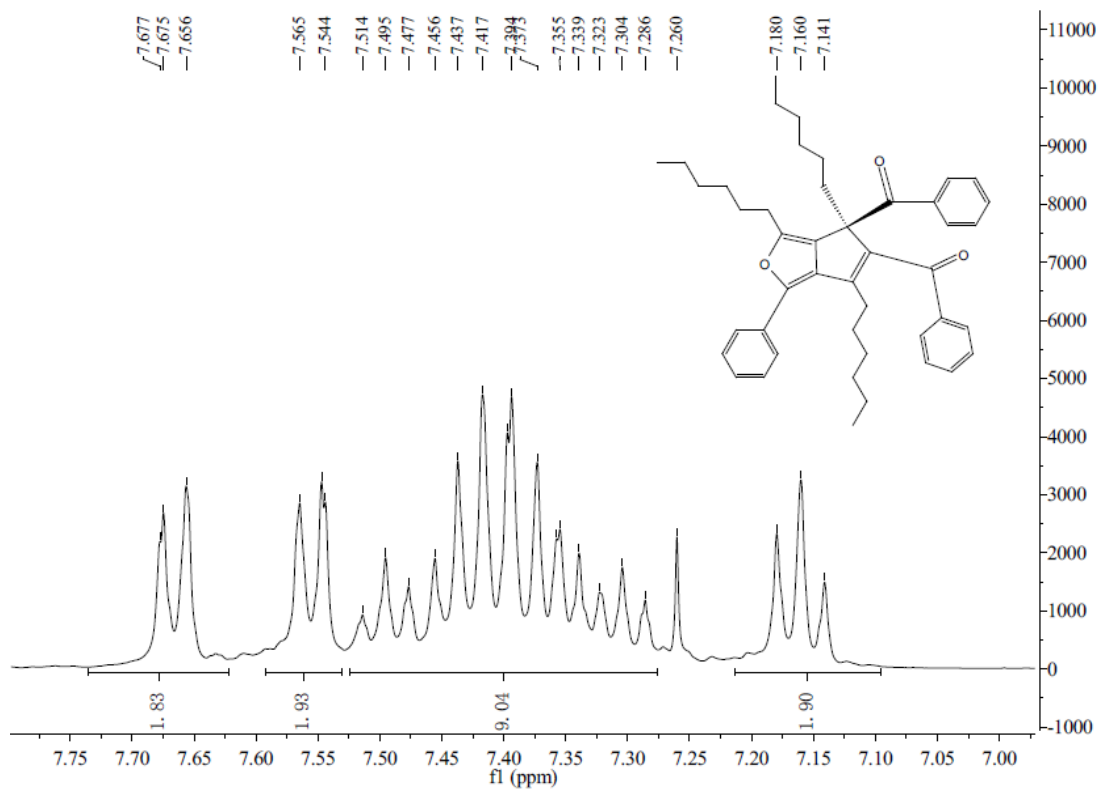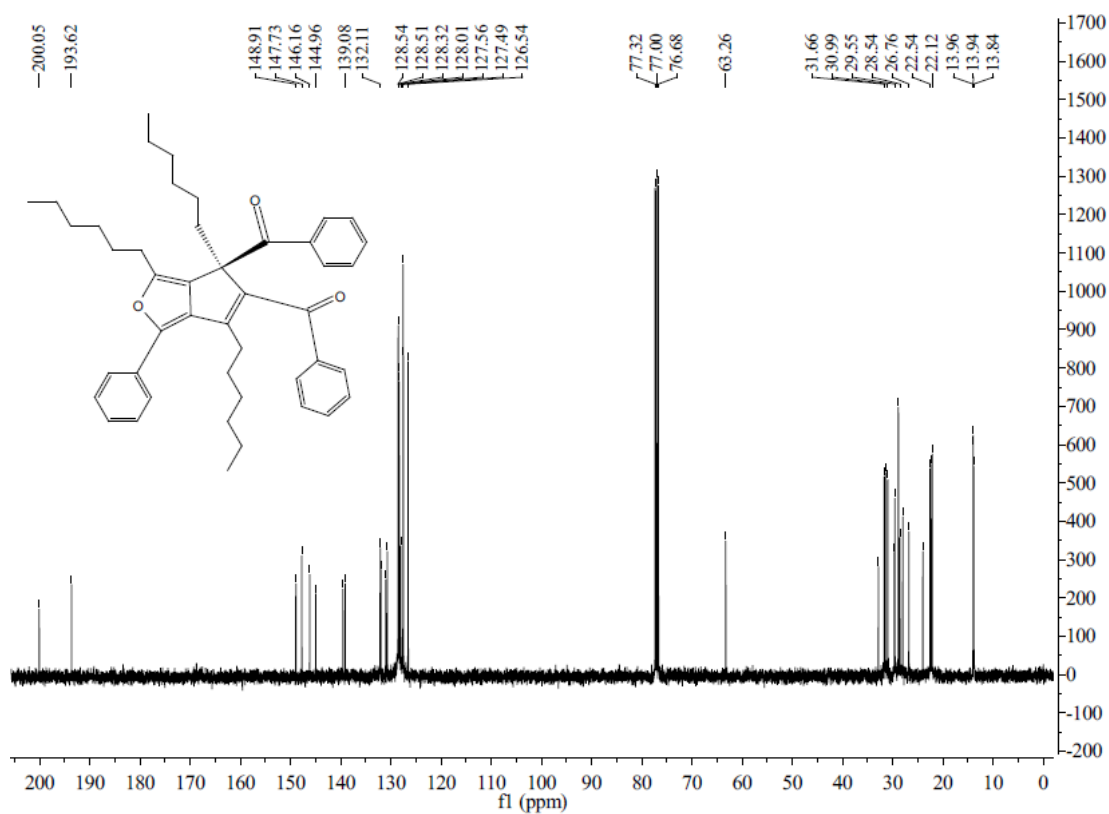

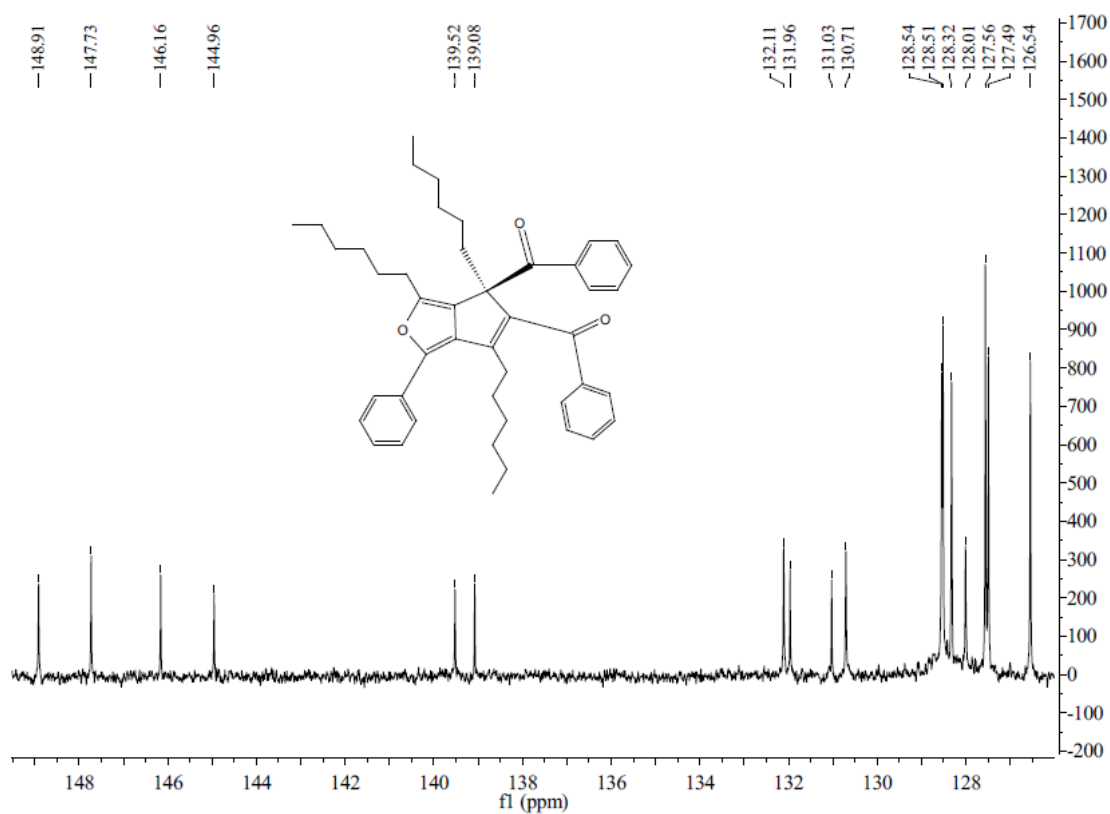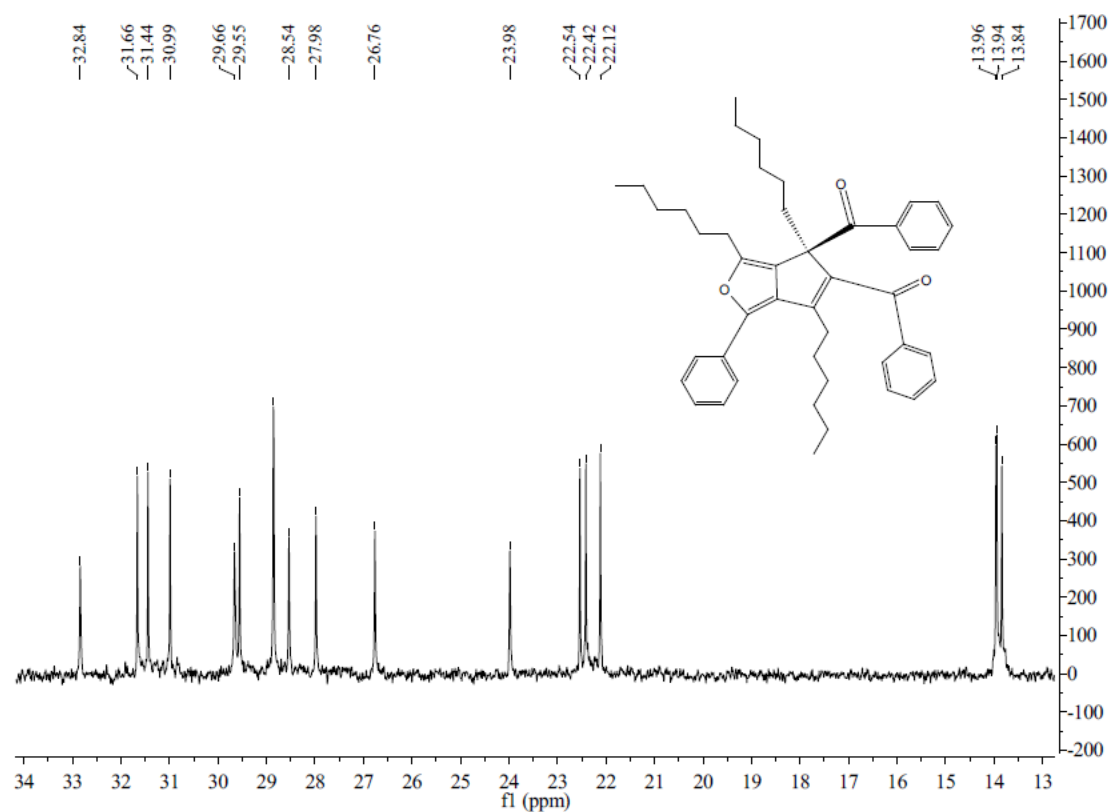

**2m:**

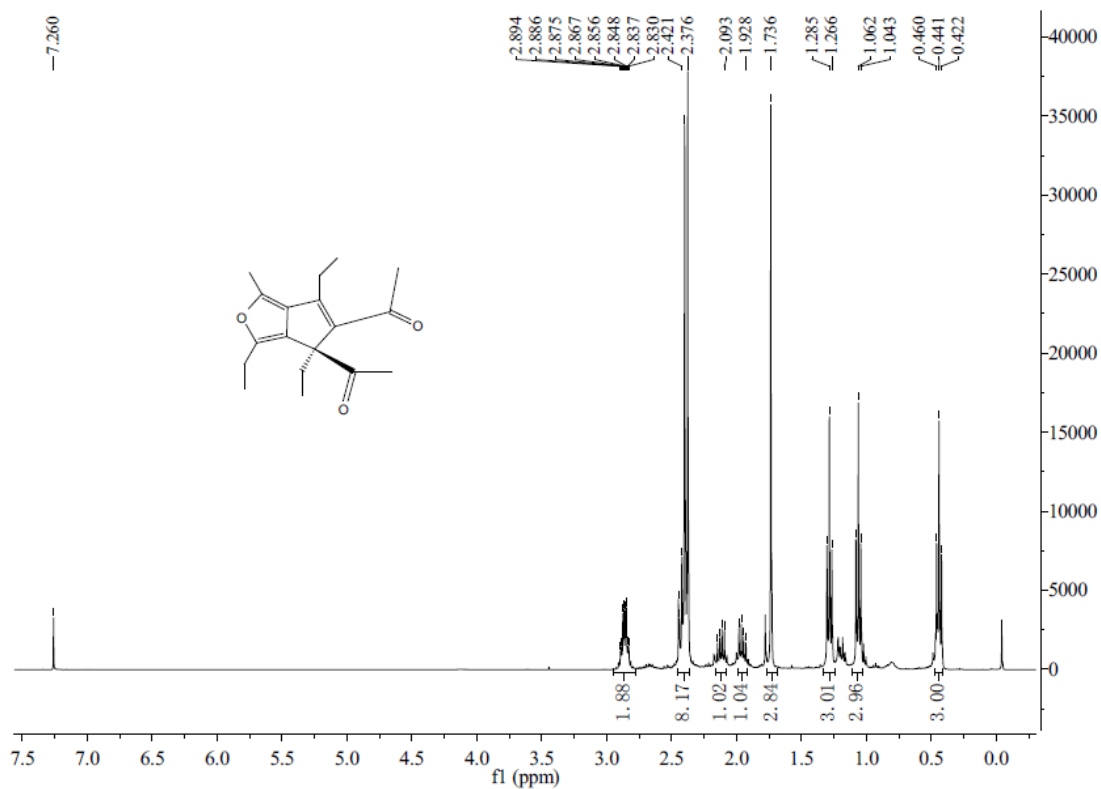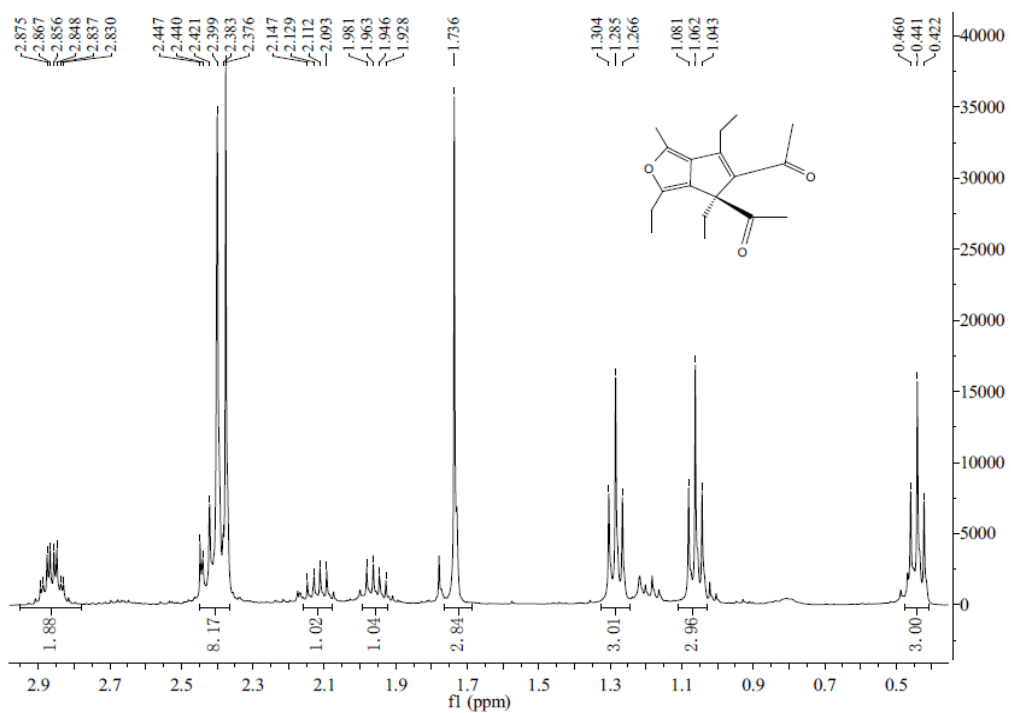

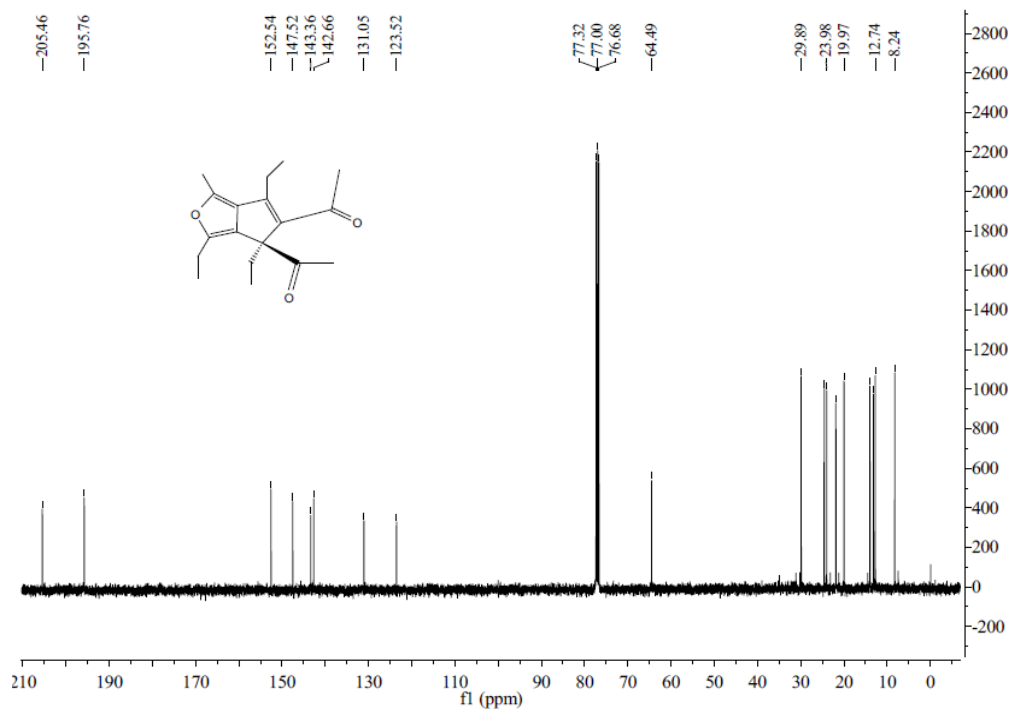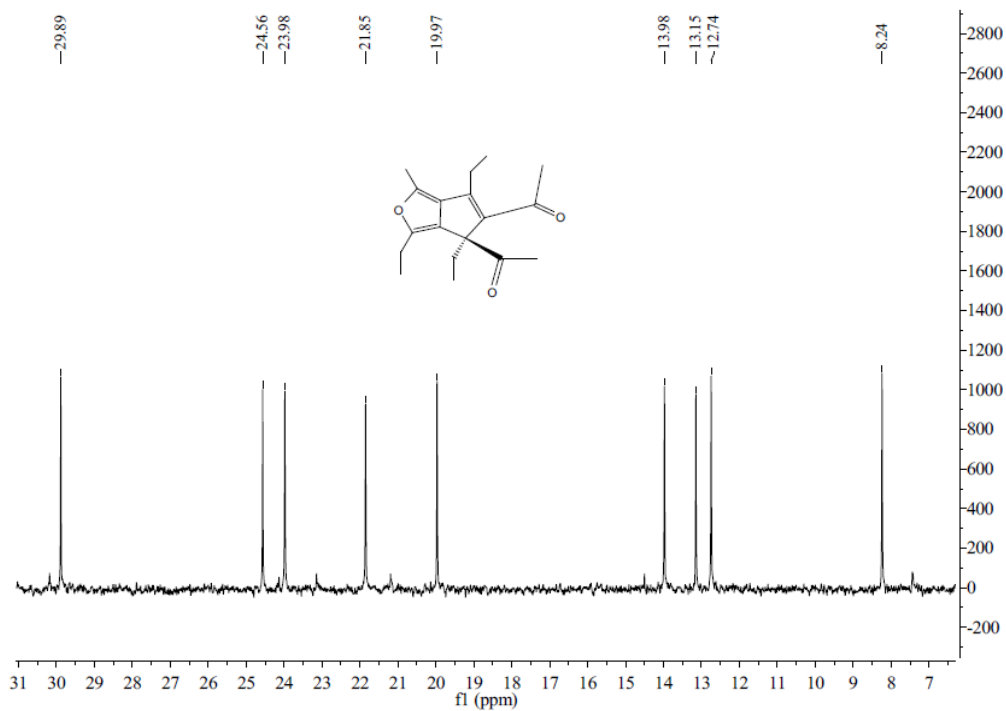

## F. X-Ray Crystallographic Analysis for 2a and 2k

Table 1. Crystal data and structure refinement for compound **2a**.

|                                   |                                                                                                            |
|-----------------------------------|------------------------------------------------------------------------------------------------------------|
| Empirical formula                 | C <sub>45</sub> H <sub>30</sub> O <sub>3</sub>                                                             |
| Formula weight                    | 618.69                                                                                                     |
| Temperature                       | 293(2) K                                                                                                   |
| Wavelength                        | 0.71073 Å                                                                                                  |
| Crystal system                    | Monoclinic                                                                                                 |
| space group                       | P21/c                                                                                                      |
| Unit cell dimensions              | a = 19.726(4) Å    α = 90 deg.<br>b = 9.4866(19) Å    β = 119.02(3) deg.<br>c = 20.005(4) Å    γ = 90 deg. |
| Volume                            | 3273.6(11) Å <sup>3</sup>                                                                                  |
| Z                                 | 4                                                                                                          |
| Calculated density                | 1.255 Mg/m <sup>3</sup>                                                                                    |
| Absorption coefficient            | 0.077 mm <sup>-1</sup>                                                                                     |
| F(000)                            | 1296                                                                                                       |
| Crystal size                      | 0.30 × 0.26 × 0.22 mm                                                                                      |
| Theta range for data collection   | 3.08 to 25.20 deg.                                                                                         |
| Limiting indices                  | -23 ≤ h ≤ 23, -11 ≤ k ≤ 10, -23 ≤ l ≤ 23                                                                   |
| Reflections collected             | 24381                                                                                                      |
| unique                            | 5889 [R(int) = 0.0742]                                                                                     |
| Completeness to theta = 25.20     | 99.8 %                                                                                                     |
| Max. and min. transmission        | 0.9832 and 0.9771                                                                                          |
| Refinement method                 | Full-matrix least-squares on F <sup>2</sup>                                                                |
| Data / restraints / parameters    | 5889 / 42 / 434                                                                                            |
| Goodness-of-fit on F <sup>2</sup> | 0.934                                                                                                      |
| Final R indices [I > 2σ(I)]       | R <sub>1</sub> = 0.0759, wR <sub>2</sub> = 0.1881                                                          |
| R indices (all data)              | R <sub>1</sub> = 0.1492, wR <sub>2</sub> = 0.2572                                                          |
| Extinction coefficient            | 0.016(3)                                                                                                   |

Table 2. Crystal data and structure refinement for compound **2k**.

|                        |                                                                                                            |
|------------------------|------------------------------------------------------------------------------------------------------------|
| Empirical formula      | C <sub>45</sub> H <sub>27</sub> F <sub>3</sub> O <sub>3</sub>                                              |
| Formula weight         | 672.67                                                                                                     |
| Temperature            | 293(2) K                                                                                                   |
| Wavelength             | 0.71073 Å                                                                                                  |
| Crystal system         | P2(1)/c                                                                                                    |
| space group            | Monoclinic                                                                                                 |
| Unit cell dimensions   | a = 20.293(4) Å    α = 90 deg.<br>b = 9.2343(18) Å    β = 117.20(3) deg.<br>c = 20.400(4) Å    γ = 90 deg. |
| Volume                 | 3400.1(12) Å <sup>3</sup>                                                                                  |
| Z                      | 4                                                                                                          |
| Calculated density     | 1.314 Mg/m <sup>3</sup>                                                                                    |
| Absorption coefficient | 0.093 mm <sup>-1</sup>                                                                                     |
| F(000)                 | 1392                                                                                                       |



---

|                                   |                                                   |
|-----------------------------------|---------------------------------------------------|
| Crystal size                      | 0.40 × 0.30 × 0.20 mm                             |
| Theta range for data collection   | 3.09 to 27.44 deg.                                |
| Limiting indices                  | -26 ≤ h ≤ 26, -11 ≤ k ≤ 11, -24 ≤ l ≤ 26          |
| Reflections collected             | 32220                                             |
| unique                            | 7728 [R(int) = 0.0758]                            |
| Completeness to theta = 27.44     | 99.8 %                                            |
| Max. and min. transmission        | 0.9817 and 0.9639                                 |
| Refinement method                 | Full-matrix least-squares on F <sup>2</sup>       |
| Data / restraints / parameters    | 7728 / 0 / 461                                    |
| Goodness-of-fit on F <sup>2</sup> | 0.972                                             |
| Final R indices [I > 2σ(I)]       | R <sub>1</sub> = 0.0699, wR <sub>2</sub> = 0.1848 |
| R indices (all data)              | R <sub>1</sub> = 0.1562, wR <sub>2</sub> = 0.2393 |
| Extinction coefficient            | 0.0066(15)                                        |
| Largest diff. peak and hole       | 0.668 and -0.291 e.Å <sup>-3</sup>                |

---
